# Supplementary material for: Enhancement of the coordinating flexibility in a Schiff–Mannich combo ligand: forced generation of a new NiII–Ophenoxo–LnIII–Oalkoxo–LnIII array (Ln = Gd, Tb, Dy and Ho)
Source: Royal Society of Chemistry journal article supplement (doi:10.1039/d0nj05812b), 2021-01-01
Supplement: d0nj05812b1.pdf [file d0nj05812b1.pdf]

## Electronic Supplementary Information

### **Enhancement of coordinating flexibility in a Schiff–Mannich combo ligand: Forced generation of new Ni<sup>II</sup>–O<sub>phenoxo</sub>–Ln<sup>III</sup>–O<sub>alkoxo</sub>–Ln<sup>III</sup> array (Ln = Gd, Tb, Dy and Ho)**

Riya Bag,<sup>a</sup> Yeasin Sikdar,<sup>a</sup> Pinaki Saha,<sup>a</sup> Prasanta Ghosh,<sup>b</sup> Michael G. B. Drew,<sup>c</sup> Jinkui Tang,<sup>d\*</sup> Sanchita Goswami<sup>a\*</sup>

<sup>a</sup>Department of Chemistry, University of Calcutta, 92, A.P.C. Road, Kolkata, India.

<sup>b</sup>Department of Chemistry, R. K. Mission Residential College, Narendrapur, Kolkata–103, India

<sup>c</sup>Department of Chemistry, University of Reading, Whiteknights, Reading RG6 6AD, UK

<sup>d</sup>State Key Laboratory of Rare Earth Resource Utilization, Changchun Institute of Applied Chemistry, Chinese Academy of Sciences, Changchun 130022, PR China.

| <b>Contents</b>                                                                                                                                                                                                | <b>Page No.</b> |
|----------------------------------------------------------------------------------------------------------------------------------------------------------------------------------------------------------------|-----------------|
| <b>Scheme S1</b> Synthetic route to complexes <b>1–4</b> .                                                                                                                                                     | S3              |
| <b>Fig. S1</b> FT–IR spectrum of H <sub>6</sub> L, complex [Ni(H <sub>4</sub> L·2H)](ClO <sub>4</sub> ) <sub>2</sub> , <b>1</b> , <b>2</b> , <b>3</b> and <b>4</b> .                                           | S3              |
| <b>Fig. S2</b> ESI–MS spectrum of [Ni(H <sub>4</sub> L·2H)](ClO <sub>4</sub> ) <sub>2</sub> complex.                                                                                                           | S4              |
| <b>Fig. S3</b> ESI–MS spectrum of <b>1</b> .                                                                                                                                                                   | S5              |
| <b>Fig. S4</b> ESI–MS spectrum of <b>2</b> .                                                                                                                                                                   | S6              |
| <b>Fig. S5</b> ESI–MS spectrum of <b>3</b> .                                                                                                                                                                   | S7              |
| <b>Fig. S6</b> ESI–MS spectrum of <b>4</b> .                                                                                                                                                                   | S8              |
| <b>Fig. S7</b> Experimental (red) and calculated (black) Powder X–ray diffraction spectrum of complex <b>1</b> , <b>2</b> , <b>3</b> and <b>4</b> to determine the phase purity.                               | S9              |
| <b>Fig. S8</b> Molecular structure of <b>1</b> with ellipsoids at the 20% probability level (Only the major component of the disorder is shown. Hydrogen atoms and solvent molecule were omitted for clarity). | S10             |
| <b>Fig. S9</b> Molecular structure of <b>2</b> with ellipsoids at the 20% probability level (Only the major component of the disorder is shown. Hydrogen atoms and solvent molecule were omitted for clarity). | S11             |

|                                                                                                                                                                                                                                                |     |
|------------------------------------------------------------------------------------------------------------------------------------------------------------------------------------------------------------------------------------------------|-----|
| <b>Fig. S10</b> Molecular structure of <b>4</b> with ellipsoids at the 20% probability level (Only the major component of the disorder is shown. Hydrogen atoms and solvent molecule were omitted for clarity).                                | S12 |
| <b>Fig. S11</b> A 2D corrugated sheet like structure formed by H-bonding and C–H··· $\pi$ interaction along crystallographic axis <i>b</i> and <i>c</i> respectively.                                                                          | S13 |
| <b>Fig. S12</b> Field dependence of magnetization for complex <b>1</b> at 1.9 K.                                                                                                                                                               | S14 |
| <b>Fig. S13</b> Field dependence of magnetization for complexes <b>2–4</b> at 1.9, 3.0 and 5 K. Inset: plots of the reduced magnetization <i>M</i> versus <i>HT</i> <sup>-1</sup> .                                                            | S14 |
| <b>Fig. S14</b> Temperature dependence of in-phase ( $\chi'$ ) and out-of-phase ( $\chi''$ ) ac signals for complexes <b>2–4</b> under a zero dc field at 997 Hz and 1.9 K.                                                                    | S15 |
| <b>Fig. S15</b> Field dependence of in-phase ( $\chi'$ ) and out-of-phase ( $\chi''$ ) ac signals for complexes <b>2–4</b> at 997 Hz and 1.9 K.                                                                                                | S16 |
| <b>Fig. S16</b> Temperature dependence of $\chi'$ and $\chi''$ ac signals for complex <b>3</b> under a 800 Oe dc field at 997 Hz.                                                                                                              | S16 |
| <b>Fig. S17</b> Temperature dependence of $\chi'$ (left) and $\chi''$ (right) ac signals for complex <b>3</b> under a 800 Oe dc field.                                                                                                         | S17 |
| <b>Fig. S18</b> Plots of $\ln(\chi''/\chi')$ vs. $1/T$ for complex <b>3</b> under a 800 Oe dc field. The solid line represents a fit of the results in the range of 30–1000 Hz.                                                                | S17 |
| <b>Table S1</b> Ni <sub>x</sub> <sup>II</sup> Ln <sub>y</sub> <sup>III</sup> complexes found in literature with their magnetic property.                                                                                                       | S18 |
| <b>Table S2</b> Crystal refinement parameters of <b>A3</b> and complexes <b>1–4</b> .                                                                                                                                                          | S35 |
| <b>Table S3</b> Continuous Shape Measures (CShMs) of lanthanide (Gd, Tb, Dy and Ho) centers in complex <b>1–4</b> relative to ideal 8/9-vertex polyhedra. The lowest CShMs value which corresponds to closest geometry is highlighted in bold. | S37 |
| <b>Table S4</b> Some important metric parameter of Ln <sub>2</sub> O <sub>2</sub> core.                                                                                                                                                        | S39 |
| <b>Table S5</b> Hydrogen bonding parameter found in <b>1–4</b> , (distances, Å, angles, (°)).                                                                                                                                                  | S40 |
| <b>Table S6</b> C–H··· $\pi$ interaction parameter found in <b>1–4</b> , (distances, Å).                                                                                                                                                       | S41 |

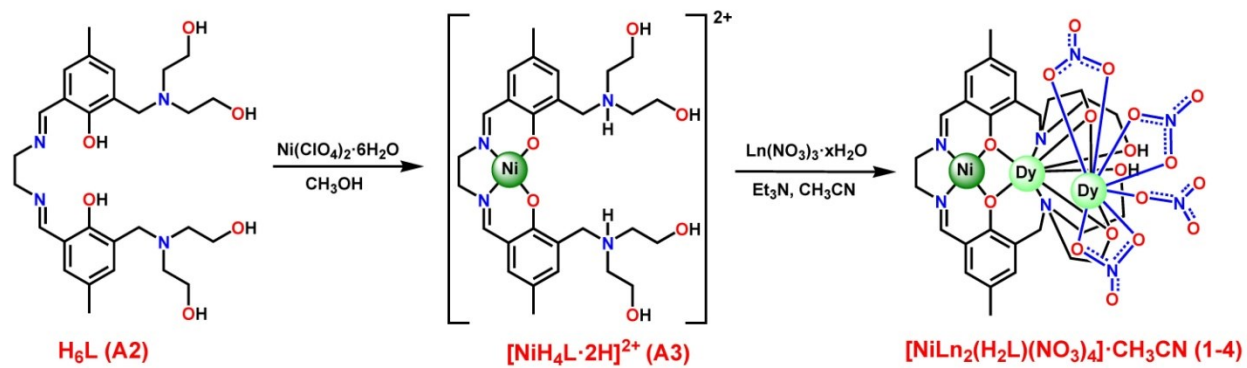

**Scheme S1** Synthetic route to complexes 1–4.

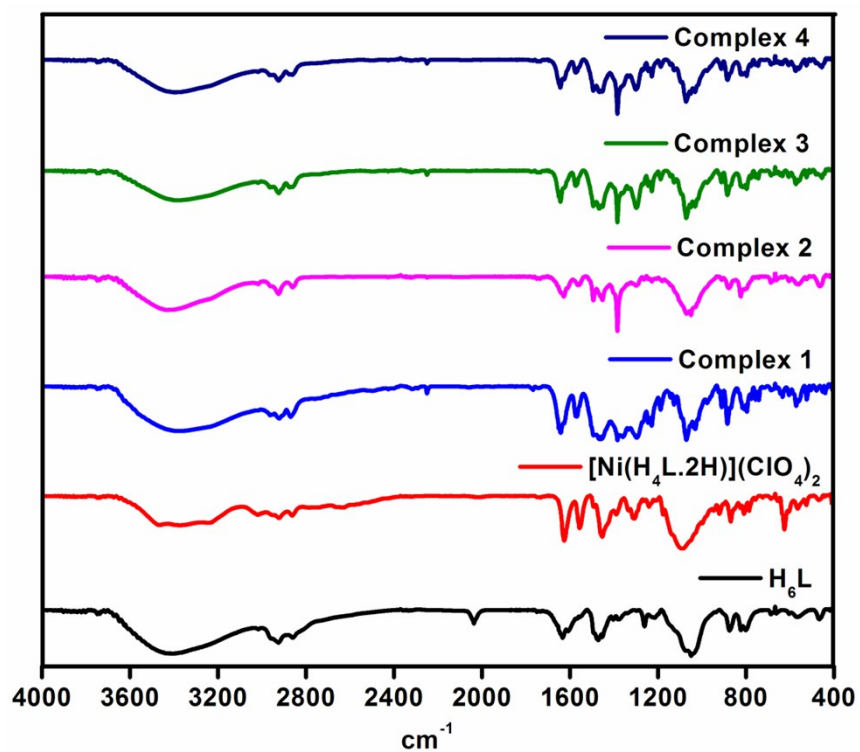

**Fig. S1** FT-IR spectrum of  $\text{H}_6\text{L}$ , complexes  $[\text{Ni}(\text{H}_4\text{L} \cdot 2\text{H})](\text{ClO}_4)_2$ , 1, 2, 3 and 4.

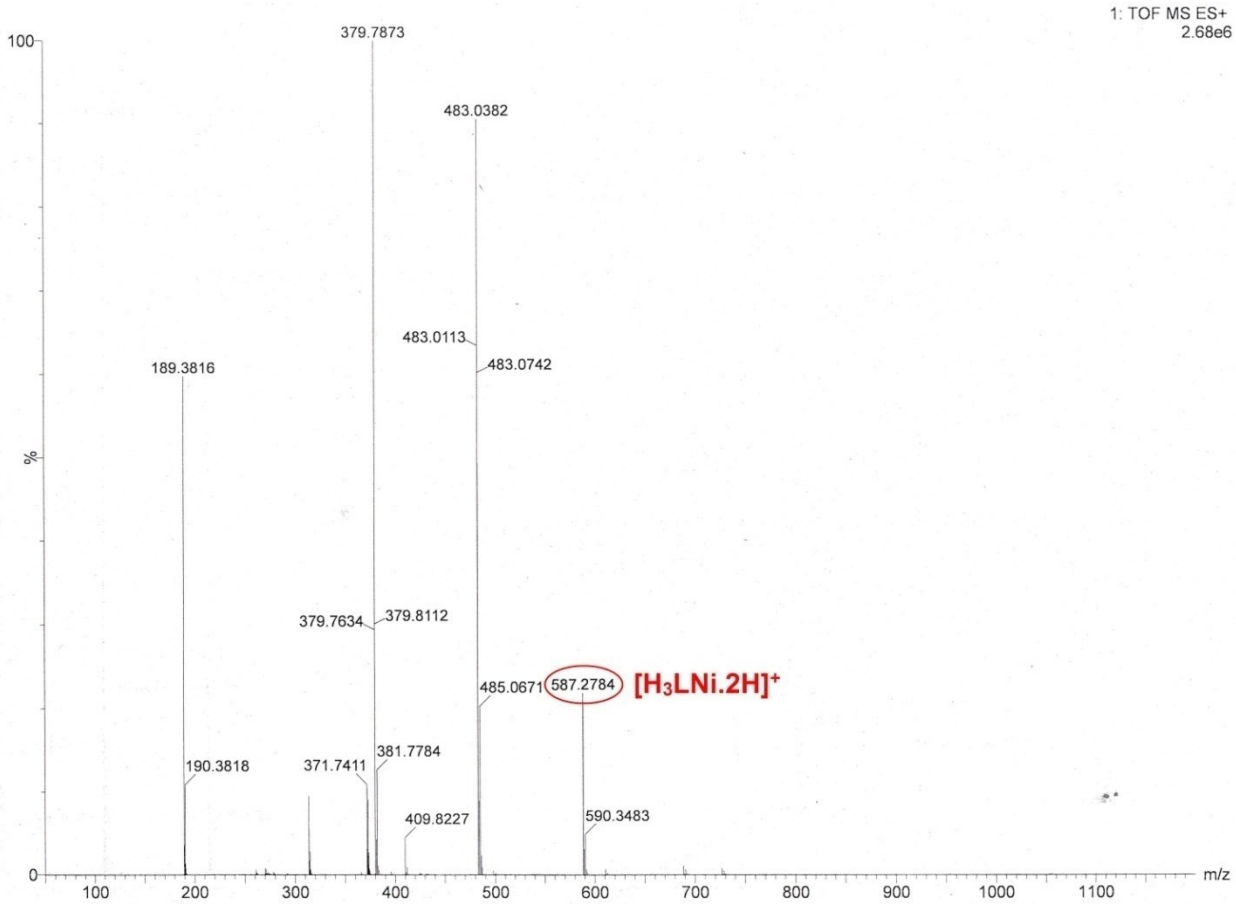

**Fig. S2** ESI-MS spectrum of  $[\text{Ni}(\text{H}_4\text{L}\cdot 2\text{H})](\text{ClO}_4)_2$  complex.

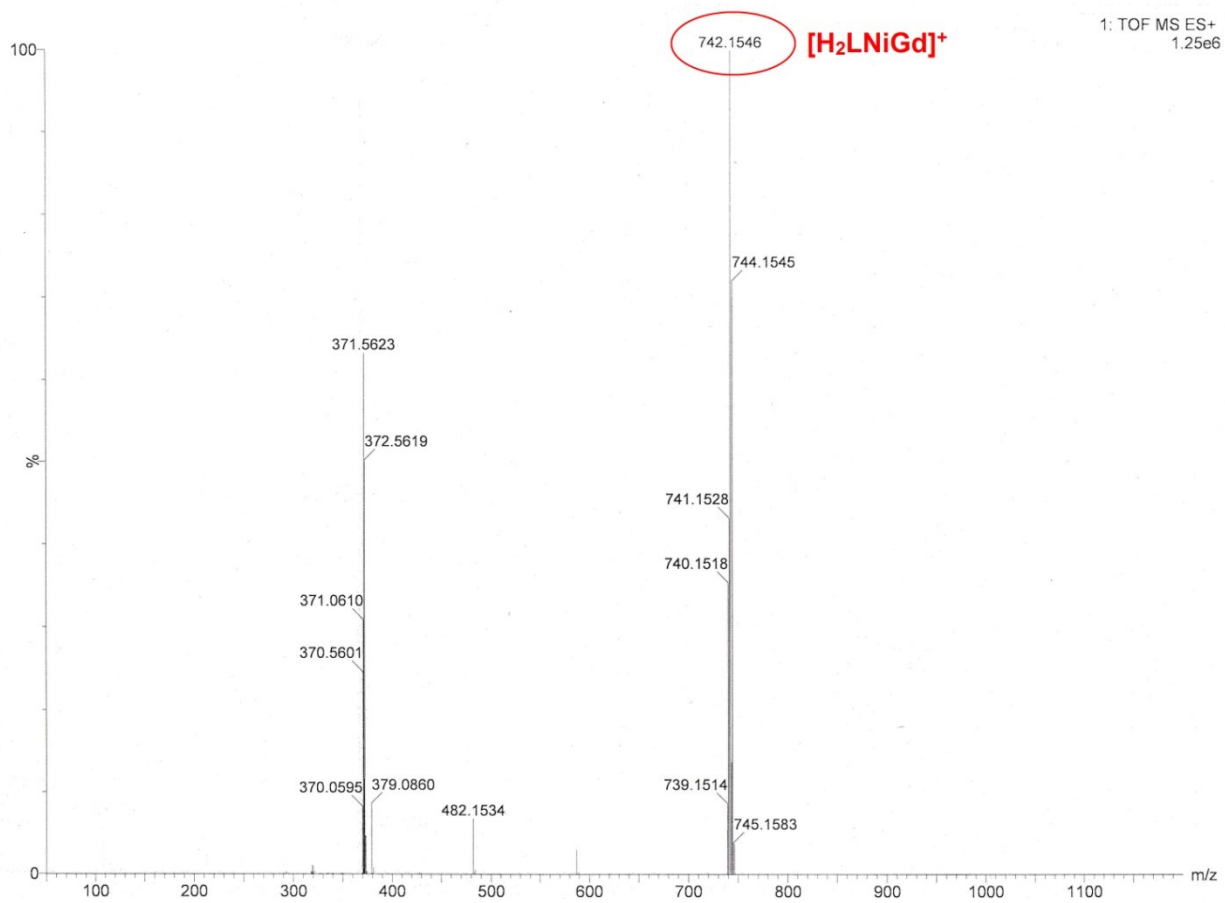

**Fig. S3** ESI-MS spectrum of **1**.

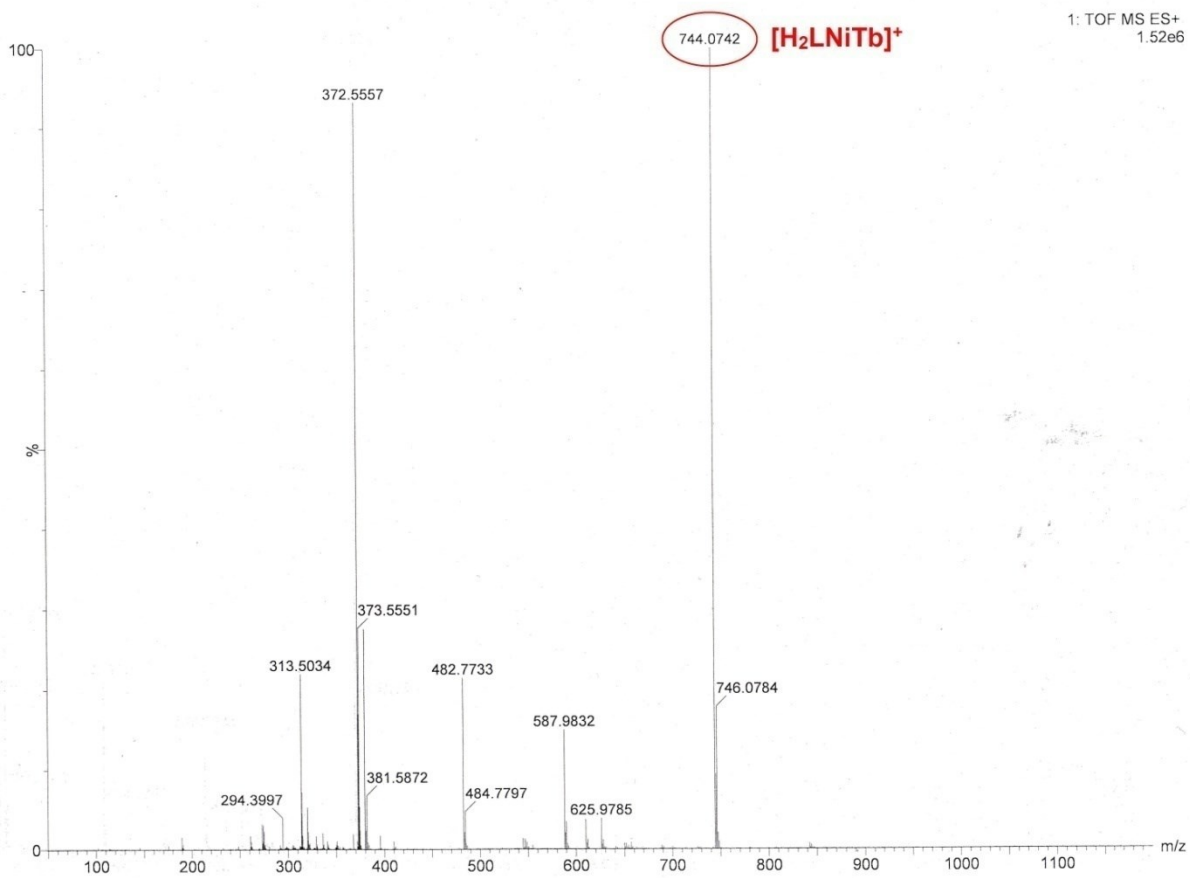

Fig. S4 ESI-MS spectrum of 2.

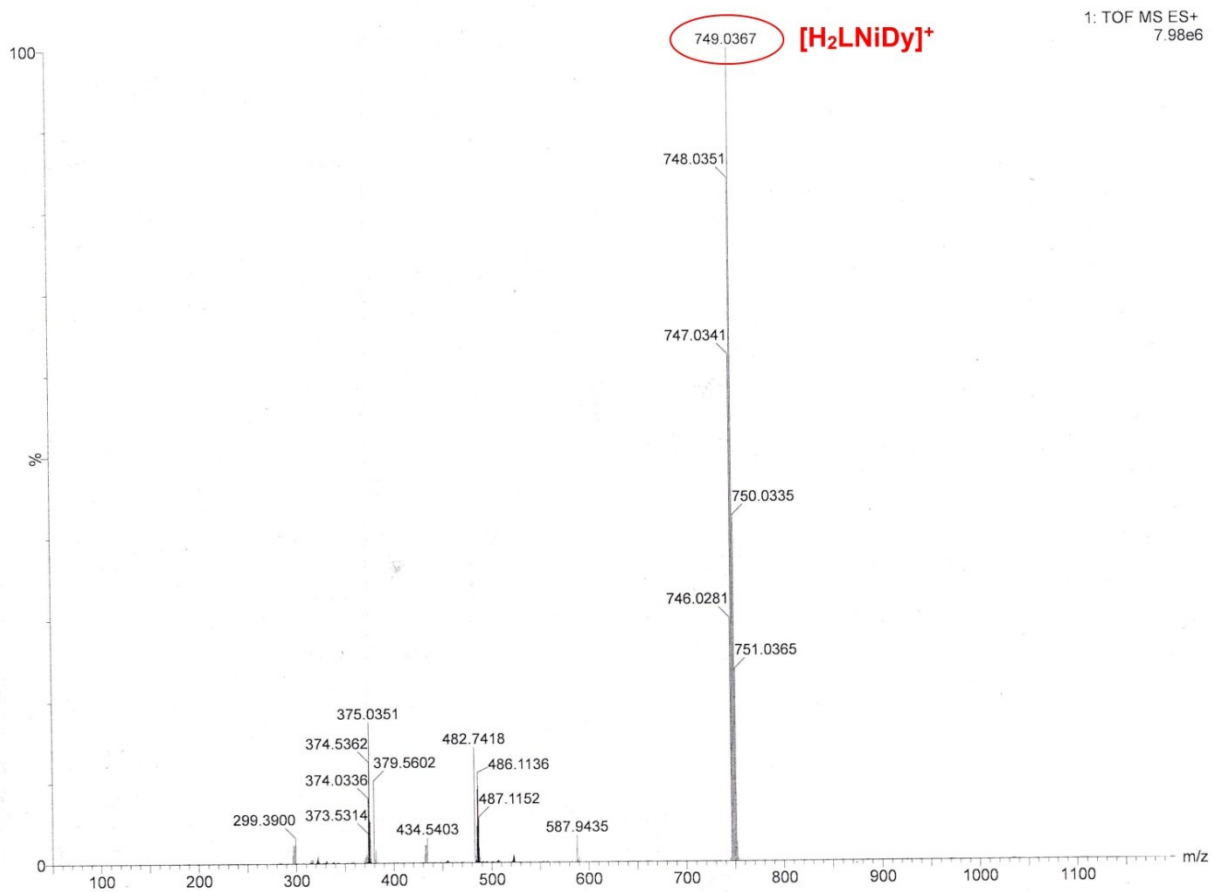

**Fig. S5** ESI-MS spectrum of **3**.

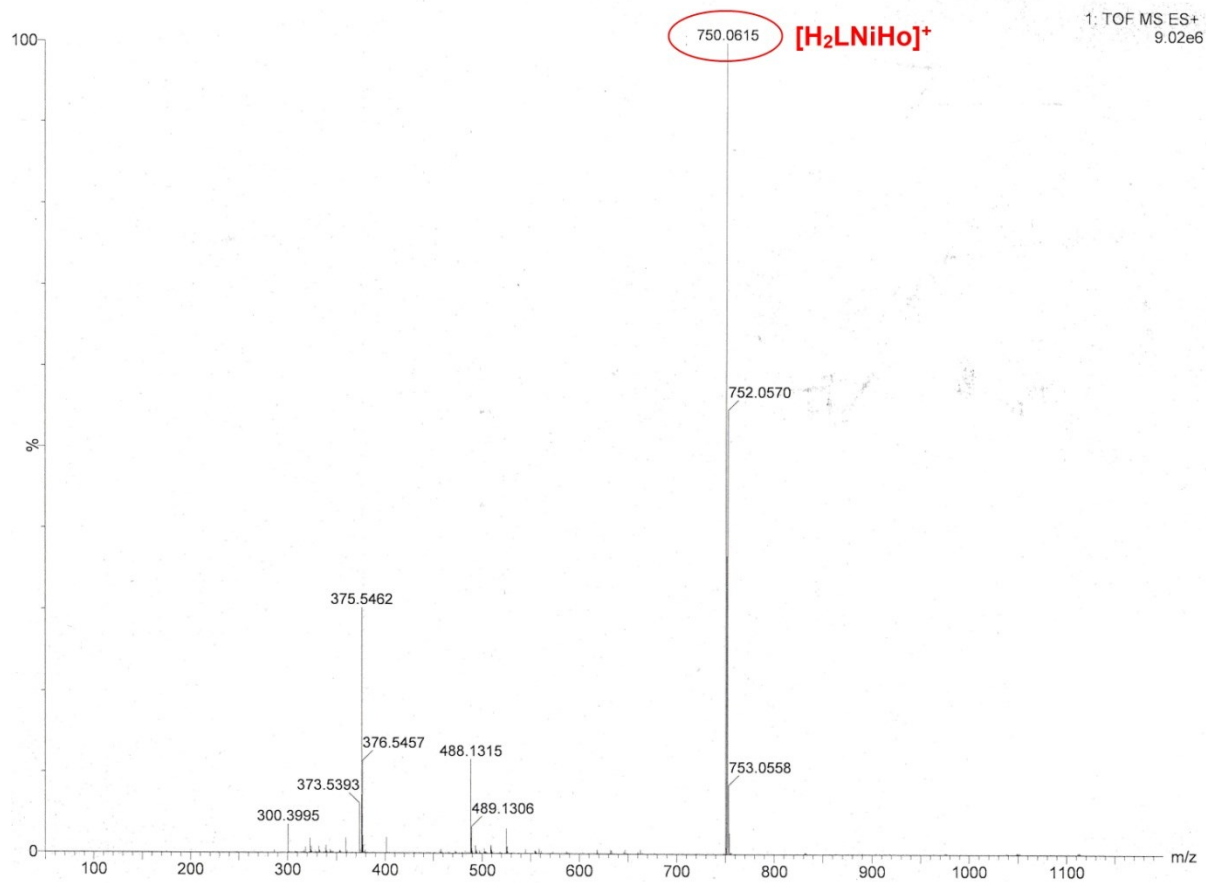

**Fig. S6** ESI-MS spectrum of **4**.



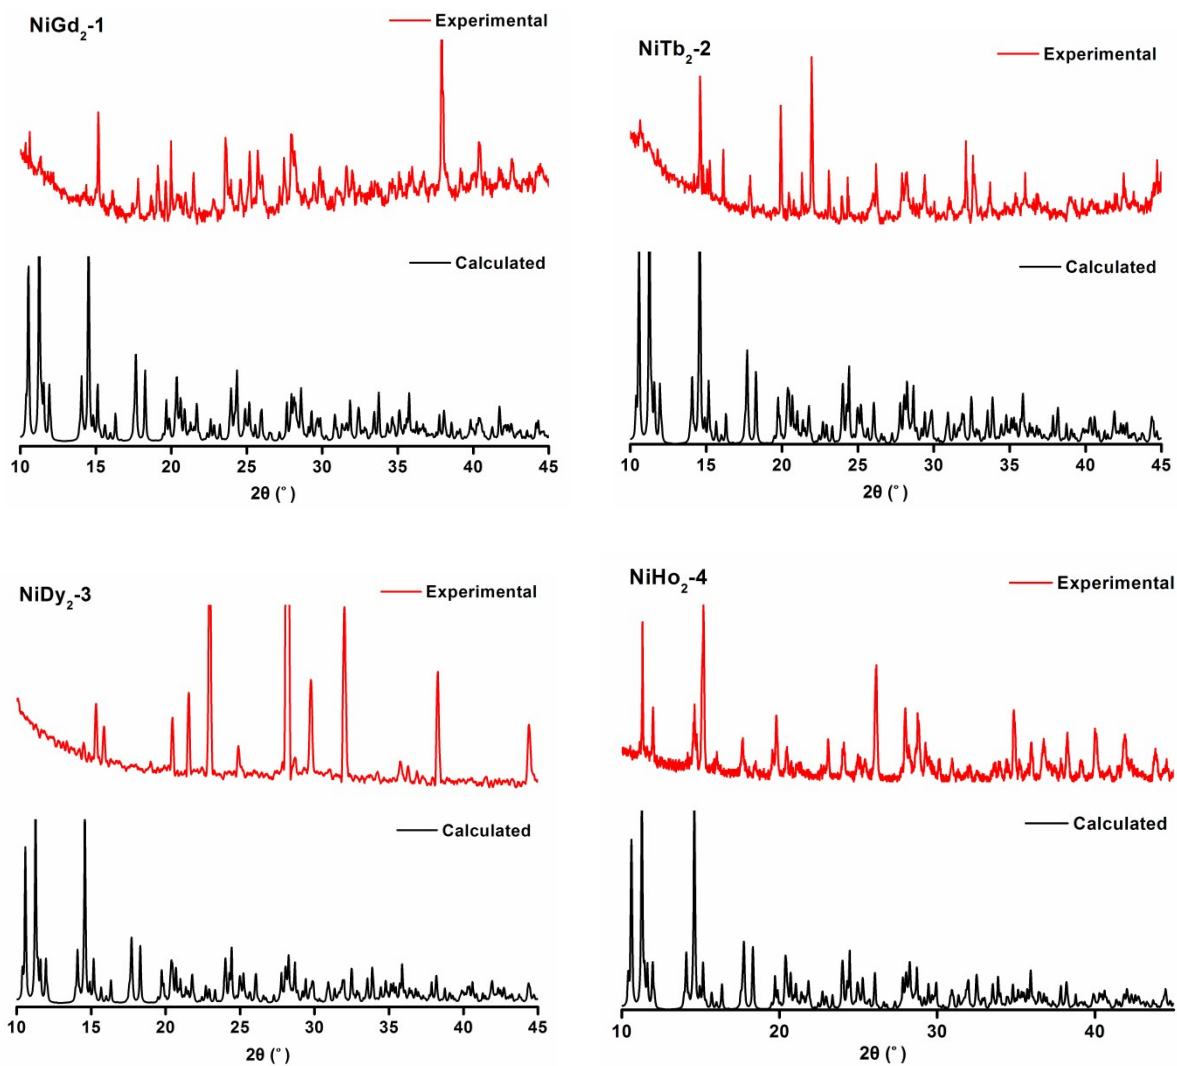

**Fig. S7** Experimental (red) and calculated (black) Powder X-ray diffraction spectrum of complex **1**, **2**, **3** and **4** to determine the phase purity.

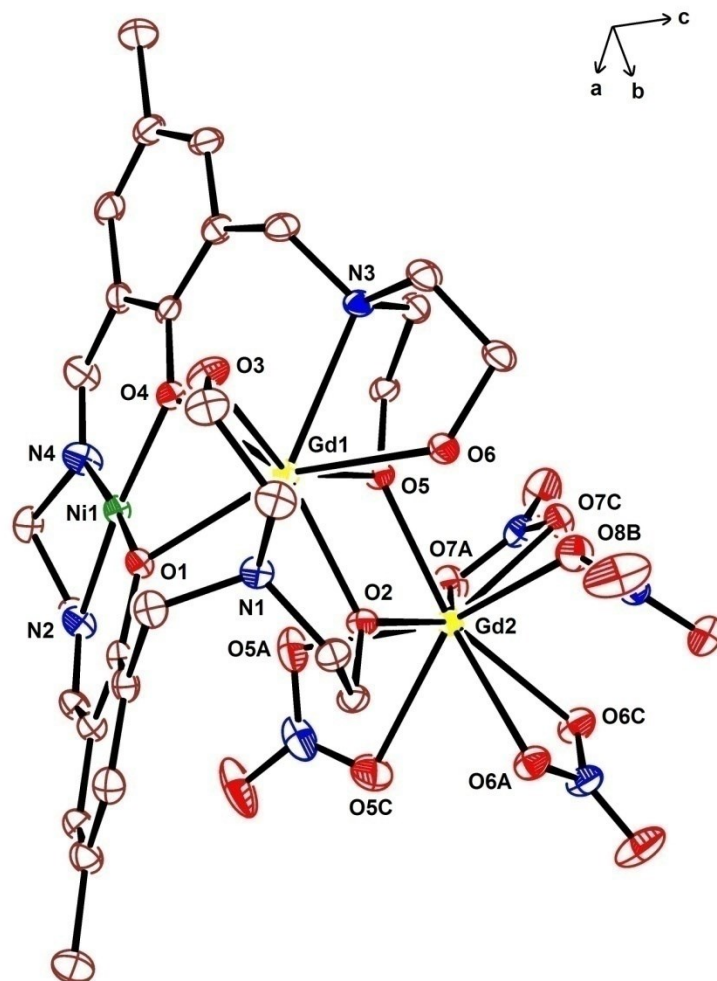

**Fig. S8** Molecular structure of **1** with ellipsoids at the 20% probability level (Only the major component of the disorder is shown. Hydrogen atoms and solvent molecule were omitted for clarity).

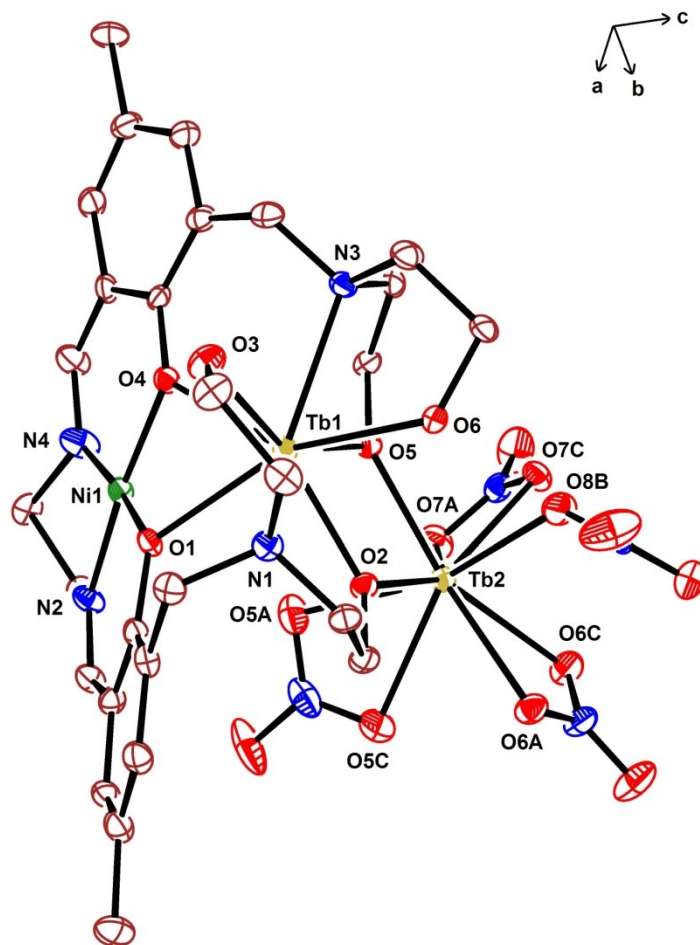

**Fig. S9** Molecular structure of **2** with ellipsoids at the 20% probability level (Only the major component of the disorder is shown. Hydrogen atoms and solvent molecule were omitted for clarity)..

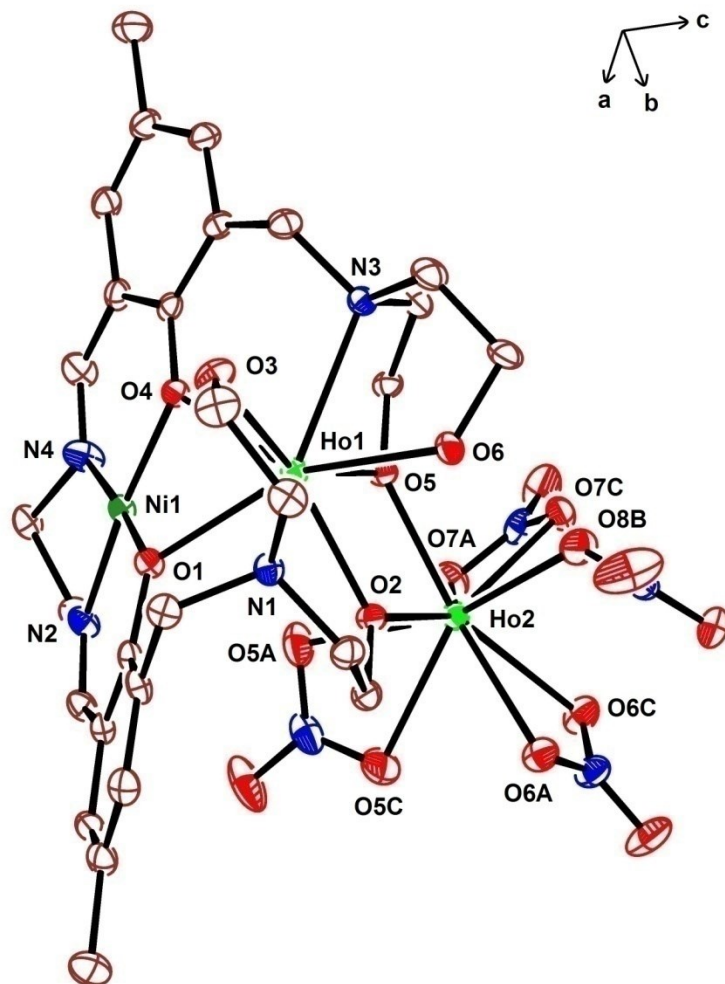

**Fig. S10** Molecular structure of **4** with ellipsoids at the 20% probability level (Only the major component of the disorder is shown. Hydrogen atoms and solvent molecule were omitted for clarity).

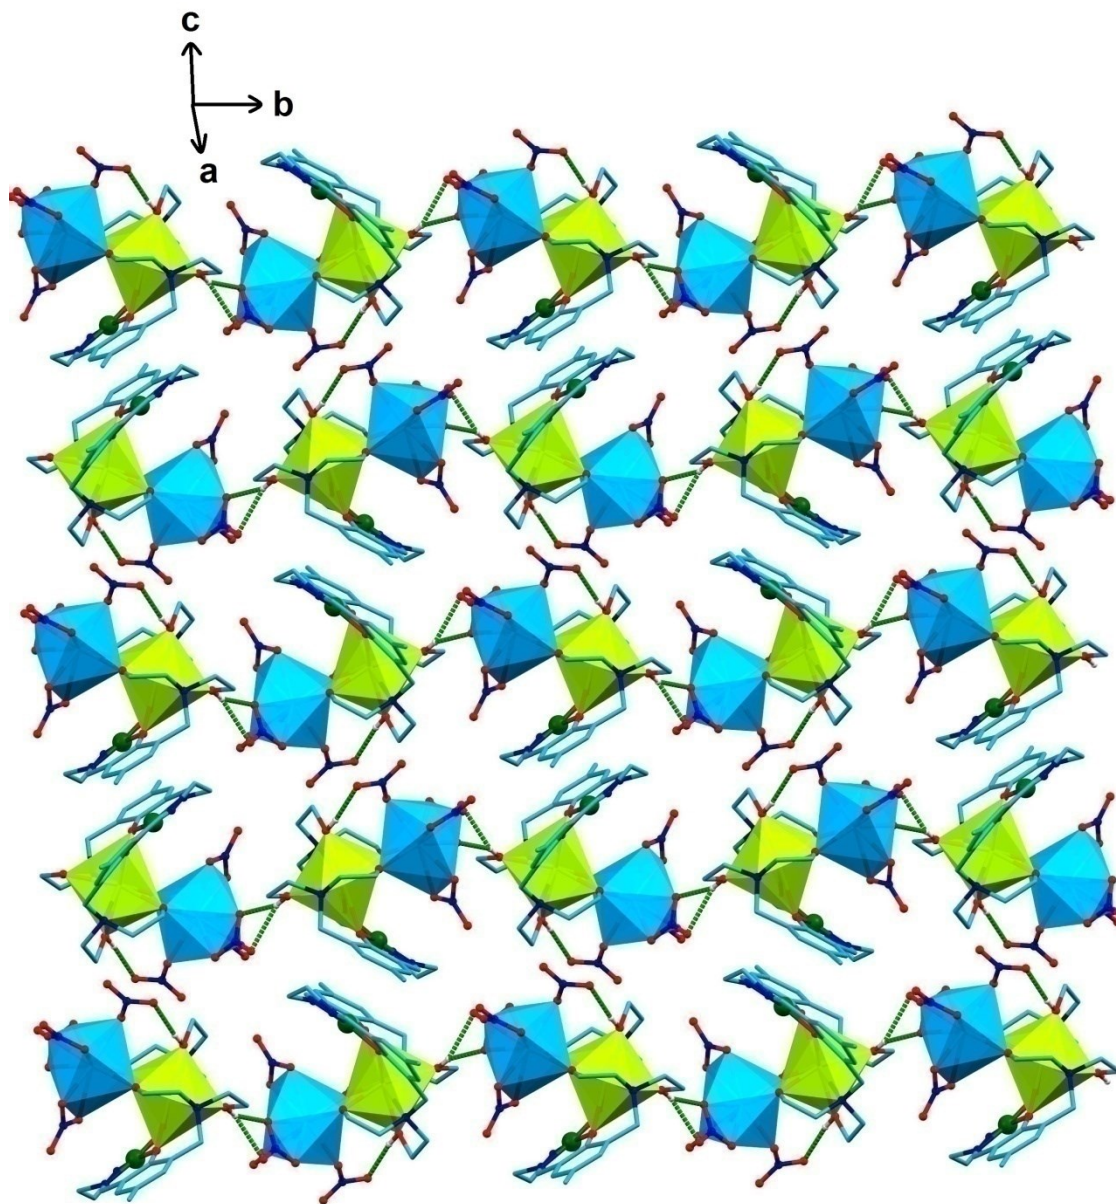

**Fig. S11** A 2D corrugated sheet like structure formed by H-bonding and C-H $\cdots$  $\pi$  interaction along crystallographic axis *b* and *c* respectively.

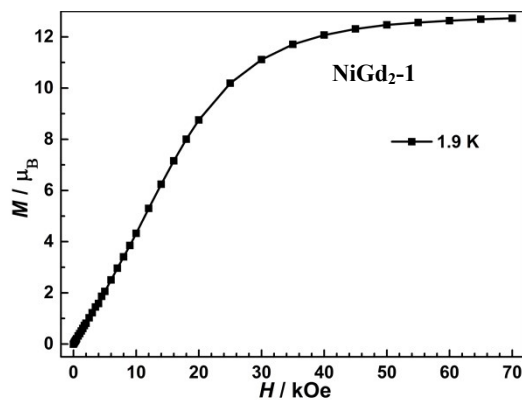

Fig. S12 Field dependence of magnetization for complex 1 at 1.9 K.

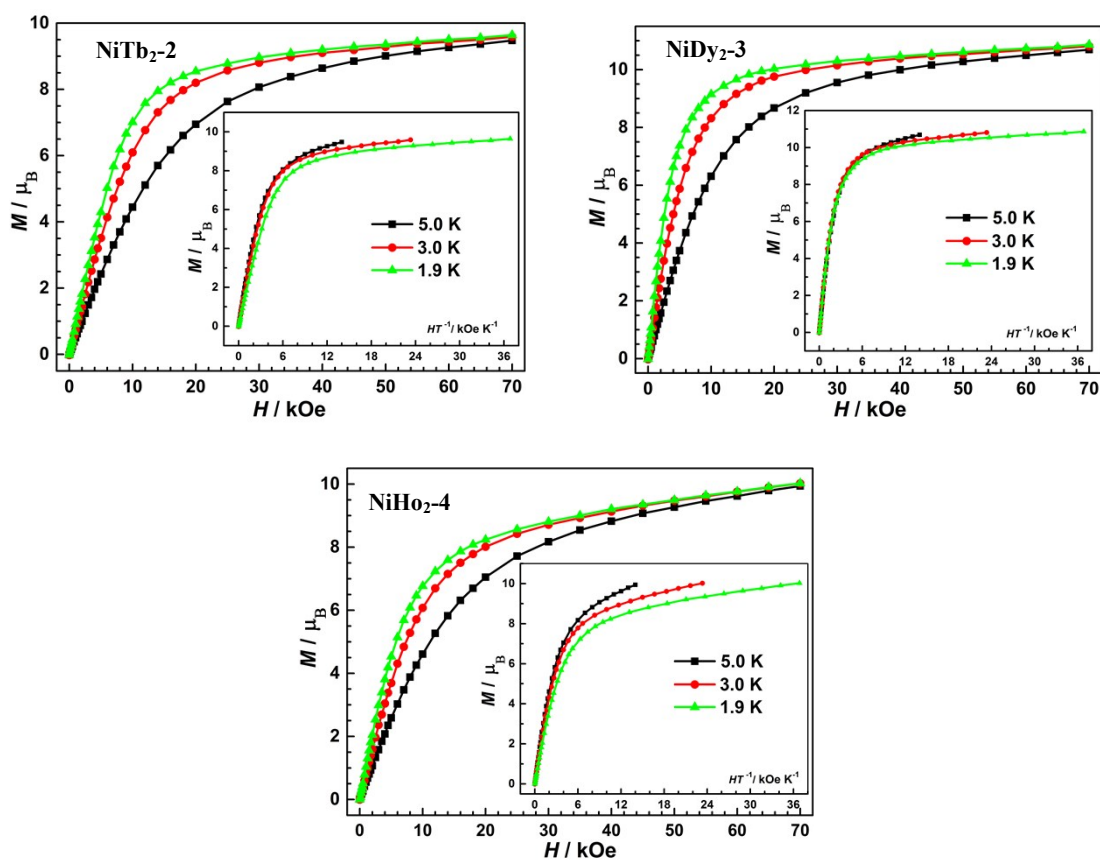

Fig. S13 Field dependence of magnetization for complexes 2–4 at 1.9, 3.0 and 5 K. Inset: plots of the reduced magnetization  $M$  versus  $HT^{-1}$ .

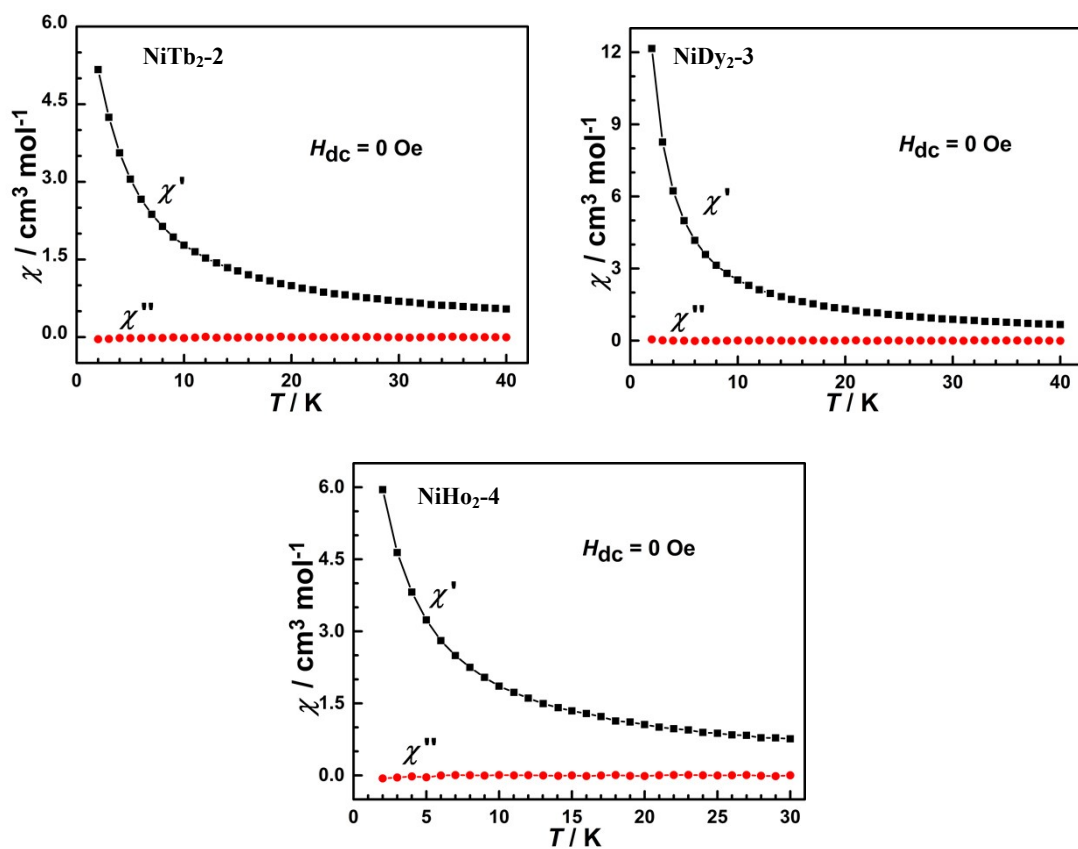

**Fig. S14** Temperature dependence of in-phase ( $\chi'$ ) and out-of-phase ( $\chi''$ ) ac signals for complexes 2–4 under a zero dc field at 997 Hz and 1.9 K.

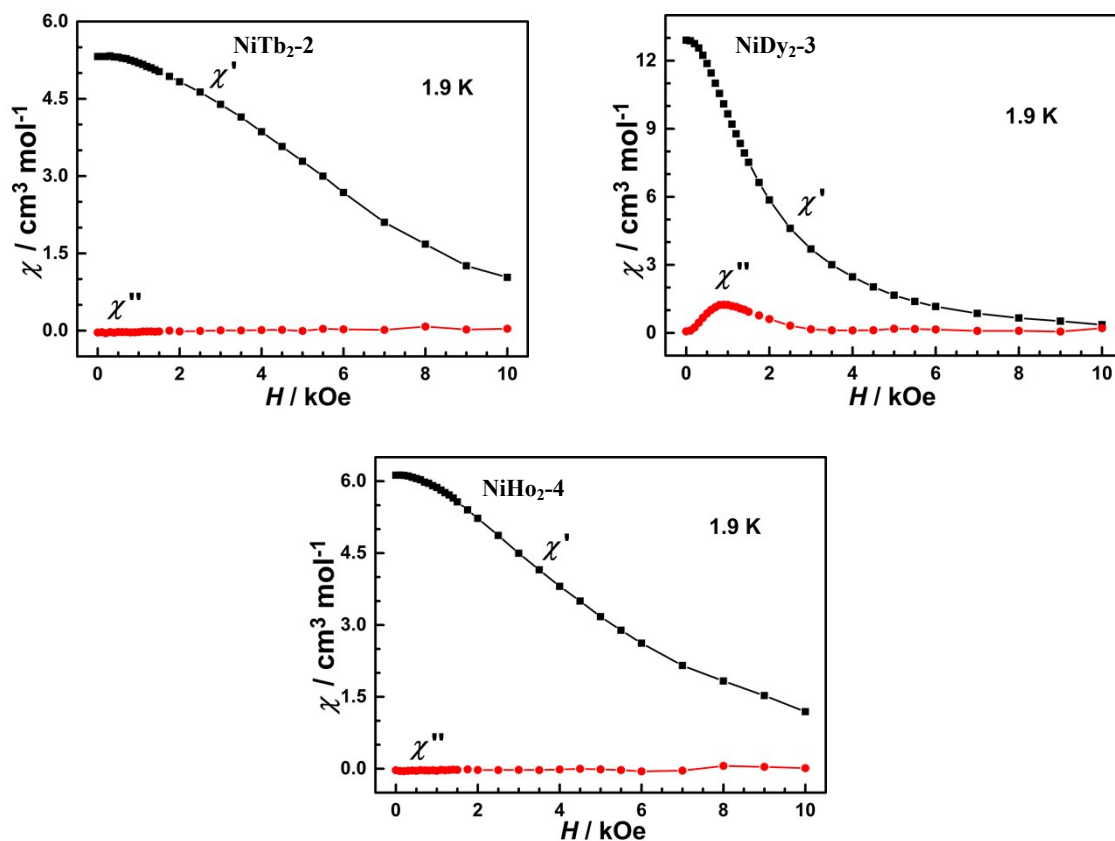

**Fig. S15** Field dependence of in-phase ( $\chi'$ ) and out-of-phase ( $\chi''$ ) ac signals for complexes 2-4 at 997 Hz and 1.9 K.

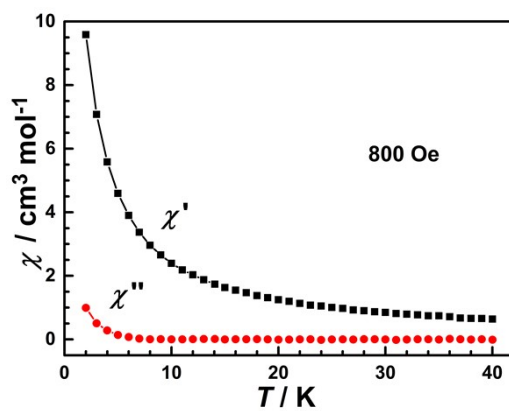

**Fig. S16** Temperature dependence of  $\chi'$  and  $\chi''$  ac signals for complex 3 under a 800 Oe dc field at 997 Hz.



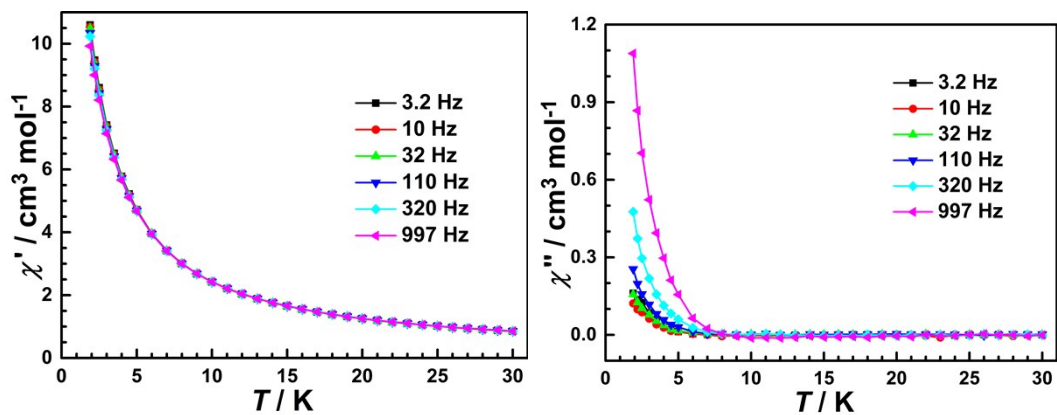

**Fig. S17** Temperature dependence of  $\chi'$  (left) and  $\chi''$  (right) ac signals for complex **3** under a 800 Oe dc field.

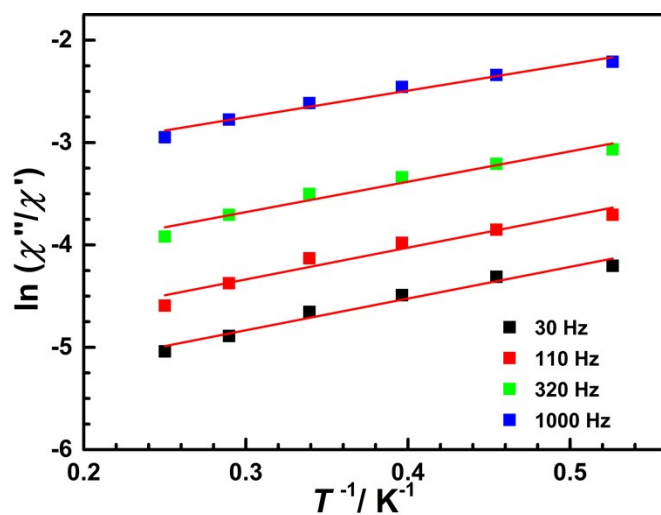

**Fig. S18** Plots of  $\ln(\chi''/\chi')$  vs.  $1/T$  for complex **3** under a 800 Oe dc field. The solid line represents a fit of the results in the range of 30–1000 Hz.

**Table S1** Ni<sup>II</sup>Ln<sup>III</sup> complexes found in literature with their magnetic property.

| Sl. No.            | Ni <sup>II</sup> /Ln <sup>III</sup> core                                            | Ln <sup>III</sup>      | Magnetic property of Ni <sup>II</sup> Ln <sup>III</sup> complexes                                                                                                                | Reference                                            |
|--------------------|-------------------------------------------------------------------------------------|------------------------|----------------------------------------------------------------------------------------------------------------------------------------------------------------------------------|------------------------------------------------------|
| 1                  | 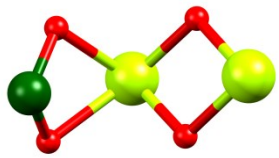   | Gd, Tb, Dy, Ho         | Slow magnetic relaxation<br>[NiDy <sub>2</sub> ]<br>U <sub>eff</sub> [NiDy <sub>2</sub> ] = 2.94 K                                                                               | This work                                            |
| <b><u>NiLn</u></b> |                                                                                     |                        |                                                                                                                                                                                  |                                                      |
| 1                  |    | Ce, Nd, Dy, Er, Yb, Eu | Slow magnetic relaxation<br>[NiCe], [NiNd], [NiDy],<br>[NiEr], [NiYb],<br>U <sub>eff</sub> [NiCe] = 4.7 K<br>U <sub>eff</sub> [NiNd] = 15.9 K<br>U <sub>eff</sub> [NiDy] = 7.7 K | <i>Dalton Trans.</i> ,<br>2019, <b>48</b> ,<br>641   |
| 2                  |  | Ce, Gd, Dy             | Slow magnetic relaxation<br>[NiLn]                                                                                                                                               | <i>Dalton Trans.</i> ,<br>2019, <b>48</b> ,<br>13943 |
| 3                  |  | Tb, Eu, Gd, Ho         | Single molecule magnet<br>[NiTb]<br>U <sub>eff</sub> [NiTb] = 7.69 K                                                                                                             | <i>Dalton Trans.</i> ,<br>2017, <b>46</b> ,<br>12558 |
|                    |  | Tb, Dy, Eu, Gd, Ho     | Single molecule magnet<br>[NiDy]<br>U <sub>eff</sub> [NiDy] = 5.14 K<br><br>Ferromagnetic [NiGd]<br>J <sub>NiGd</sub> = + 1.83 cm <sup>-1</sup>                                  |                                                      |

|   |                                                                                     |                                |                                                            |                                                   |
|---|-------------------------------------------------------------------------------------|--------------------------------|------------------------------------------------------------|---------------------------------------------------|
|   | 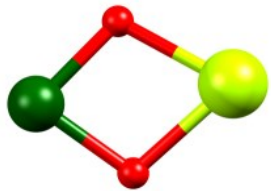   | La, Dy                         | Antiferromagnetic [NiDy]                                   |                                                   |
| 4 |    | Dy                             | Antiferromagnetic                                          | <i>New J. Chem.</i> , 2016, <b>40</b> , 6998      |
|   |    | La, Tb                         | Ferromagnetic [NiTb] <sub>n</sub>                          |                                                   |
| 5 |  | Gd, Dy                         | Slow magnetic relaxation [NiDy]                            | <i>CrystEngComm</i> , 2016, <b>18</b> , 4779      |
| 6 |  | Gd, Tb, Dy                     | Single molecule magnet [NiDy]<br>U <sub>eff</sub> = 16.9 K | <i>New J. Chem.</i> , 2015, <b>39</b> , 3467      |
| 7 |  | Ce, Nd, Sm, Eu, Gd, Tb, Dy, Yb | Single molecule magnet [NiTb], [NiDy]                      | <i>Inorg. Chim. Acta</i> , 2015, <b>435</b> , 274 |

|    |                                                                                     |                          |                                                                       |                                                |
|----|-------------------------------------------------------------------------------------|--------------------------|-----------------------------------------------------------------------|------------------------------------------------|
| 8  | 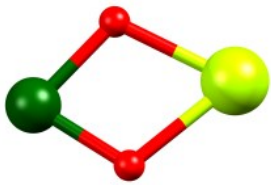   | Gd                       | Ferromagnetic<br>$J_{\text{NiGd}} = + 1.31 \text{ cm}^{-1}$           | <i>Chem. Eur. J.</i> , 2014, <b>20</b> , 14235 |
| 9  |    | Tb, Gd, Dy,<br>Ho, Er, Y | Slow magnetic relaxation<br>[NiTb], [NiDy], [NiHo]                    | <i>Dalton Trans.</i> , 2014, <b>43</b> , 8921  |
| 10 |    | Gd, Pr                   | Ferromagnetic [NiGd]<br>Antiferromagnetic [NiPr]                      | <i>Dalton Trans.</i> , 2014, <b>43</b> , 17375 |
| 11 |   | Eu, Gd, Dy,<br>Ho,       | Ferromagnetic [NiGd]<br>$J_{\text{NiGd}} = 1.56 \text{ cm}^{-1}$      | <i>New J. Chem.</i> , 2013, <b>37</b> , 2280   |
|    |  | La, Sm, Eu               | –                                                                     |                                                |
| 12 |  | Gd, Tb, Dy               | Single molecule magnet<br>[NiTb]<br>$U_{\text{eff}} = 14.9 \text{ K}$ | <i>Inorg. Chem.</i> , 2013, <b>52</b> , 6160   |

|    |                                                                                     |                      |                                                                                                                                                                                     |                                                                 |
|----|-------------------------------------------------------------------------------------|----------------------|-------------------------------------------------------------------------------------------------------------------------------------------------------------------------------------|-----------------------------------------------------------------|
| 13 | 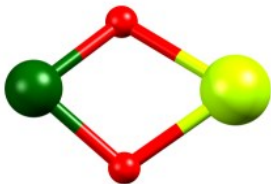   | Gd, Tb, Dy           | <p>Single molecule magnet<br/>[NiTb]and [NiDy]</p> <p><math>U_{\text{eff}} [\text{NiTb}] = 14.4 \text{ K}</math><br/><math>U_{\text{eff}} [\text{NiDy}] = 11.3 \text{ K}</math></p> | <p><i>Dalton<br/>Trans.</i>,<br/>2013, <b>42</b>,<br/>11227</p> |
|    |                                                                                     |                      | <p>Ferromagnetic [NiGd]<br/><math>J_{\text{NiGd}} = + 1.11 \text{ cm}^{-1}</math></p>                                                                                               |                                                                 |
|    |    | Gd, Tb, Ho,<br>Er, Y | <p>Ferromagnetic [NiGd]<br/><math>J_{\text{NiGd}} = + 1.38 \text{ cm}^{-1}</math></p>                                                                                               |                                                                 |
|    |   | Tb                   | Ferromagnetic                                                                                                                                                                       |                                                                 |
| 14 |  | Eu, Gd               | <p>Ferromagnetic [NiGd]<br/><math>J_{\text{NiGd}} = + 2.1 \text{ cm}^{-1}</math></p>                                                                                                | <p><i>Inorg.<br/>Chem.</i>, 201<br/>2, <b>51</b>, 5857</p>      |
|    |  | Dy                   | <p>Slow magnetic relaxation<br/><math>U_{\text{eff}} = 9.2 \text{ K}</math></p>                                                                                                     |                                                                 |
|    |  | Dy                   | <p>Slow magnetic relaxation<br/><math>U_{\text{eff}} = 10.1 \text{ K}</math></p>                                                                                                    |                                                                 |

|    |                                                                                     |                                            |                                                                       |                                                |
|----|-------------------------------------------------------------------------------------|--------------------------------------------|-----------------------------------------------------------------------|------------------------------------------------|
| 15 |    | Ce, Dy                                     | Antiferromagnetic [NiDy]                                              | <i>Dalton Trans.</i> , 2012, <b>41</b> , 13755 |
| 16 |    | Yb                                         | Ferromagnetic [NiYb]                                                  | <i>Inorg. Chem.</i> , 2012, <b>51</b> , 11279  |
| 17 |    | La, Ce, Pr, Nd, Sm, Eu, Gd, Tb, Dy, Ho, Er | Slow magnetic relaxation [NiDy]                                       | <i>Inorg. Chem.</i> , 2011, <b>50</b> , 5890   |
| 18 |   | Dy                                         | Single molecule magnet [NiDy]                                         | <i>Inorg. Chem.</i> , 2011, <b>50</b> , 7268   |
| 19 |  | Gd                                         | Antiferromagnetic [NiGd]<br>$J_{\text{NiGd}} = -0.22 \text{ cm}^{-1}$ | <i>Dalton Trans.</i> , 2010, <b>39</b> , 5020  |
| 20 |  | Ce, Sm, Gd                                 | Antiferromagnetic [NiCe], [NiSm]                                      | <i>Inorg. Chem.</i> , 2010, <b>49</b> , 9012   |

|    |                                                                                     |                    |                                                                    |                                              |
|----|-------------------------------------------------------------------------------------|--------------------|--------------------------------------------------------------------|----------------------------------------------|
| 21 | 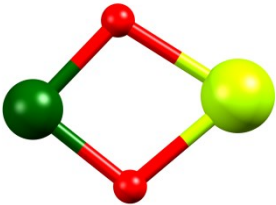   | Pr                 | Antiferromagnetic [NiPr]                                           | <i>Eur. J. Inorg. Chem.</i> , 2010, 2768     |
| 22 |    | Eu, Gd, Tb, Dy,    | Ferromagnetic [NiGd], [NiTb], [NiDy]                               | <i>Inorg. Chem.</i> , 2008, <b>47</b> , 5736 |
| 23 |    | Ce, Eu, Nd, Tb, Er | Antiferromagnetic [NiCe], [NiEr]<br>Ferromagnetic [NiNd], [NiTb]   | <i>Inorg. Chem.</i> , 2005, <b>44</b> , 3524 |
| 24 |  | Gd                 | Ferromagnetic [NiGd]                                               | <i>Chem. Commun.</i> , 2004, 1048            |
| 25 |  | Gd                 | Ferromagnetic [NiGd]<br>$J_{\text{NiGd}} = + 0.56 \text{ cm}^{-1}$ | <i>Inorg. Chem.</i> , 2002, <b>41</b> , 605  |
| 26 |  | La                 | –                                                                  | <i>Inorg. Chem.</i> , 1999, <b>38</b> , 1351 |

|                                |                                                                                     |                       |                                             |                                               |
|--------------------------------|-------------------------------------------------------------------------------------|-----------------------|---------------------------------------------|-----------------------------------------------|
| 27                             | 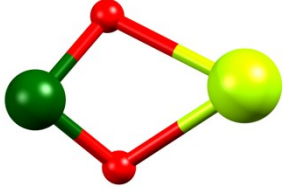   | La                    | –                                           | <i>Inorg. Chem.</i> , 1999, <b>38</b> , 1351  |
| 28                             |    | Sm, Er,<br>Sm<br>Yb   | –                                           | <i>Inorg. Chem.</i> , 1998, <b>37</b> , 4828  |
| 29                             |   | Dy                    | Antiferromagnetic [NiDy]                    | <i>Chem. Eur. J.</i> , 1998, <b>4</b> , 1616  |
| 30                             |  | Gd                    | Ferromagnetic [NiGd]                        | <i>Inorg. Chem.</i> , 1997, <b>36</b> , 4284  |
| <b><u>NiLn<sub>2</sub></u></b> |                                                                                     |                       |                                             |                                               |
| 1                              |  | Dy                    | Single molecule magnet [NiDy <sub>2</sub> ] | <i>Inorg. Chem.</i> , 2015, <b>54</b> , 4337  |
| 2                              |  | Dy                    | Ferromagnetic [NiGd]                        | <i>Chem. Eur. J.</i> , 2007, <b>13</b> , 1602 |
| 3                              |  | La, Tb, Dy,<br>Ho, Er | Single molecule magnet [NiDy <sub>2</sub> ] | <i>Polyhedron</i> , 2005, <b>24</b> , 2588    |



|   |                                                                                   |        |   |                                                 |
|---|-----------------------------------------------------------------------------------|--------|---|-------------------------------------------------|
| 4 | 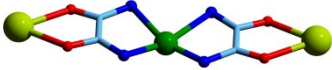 | Yb, Lu | – | <i>J. Chem. Soc., Dalton Trans.</i> , 1998, 959 |
|---|-----------------------------------------------------------------------------------|--------|---|-------------------------------------------------|

### Ni<sub>2</sub>Ln

|   |                                                                                     |                                            |                                                                                  |                                                |
|---|-------------------------------------------------------------------------------------|--------------------------------------------|----------------------------------------------------------------------------------|------------------------------------------------|
| 1 | 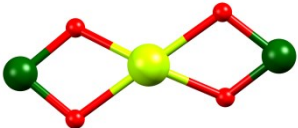   | La                                         | Antiferromagnetic [Ni <sub>2</sub> La]                                           | <i>Dalton Trans.</i> , 2014, <b>43</b> , 17375 |
| 2 |    | Gd, Tb, Dy, Ho                             | Slow magnetic relaxation [Ni <sub>2</sub> Dy]                                    | <i>Chem. Asian J.</i> , 2014, <b>9</b> , 1876  |
| 3 |   | Gd                                         | Ferromagnetic [Ni <sub>2</sub> Gd]                                               | <i>Inorg. Chem.</i> , 2009, <b>48</b> , 5555   |
|   |  | Gd                                         | Ferromagnetic [Ni <sub>2</sub> Gd]<br>$J_{\text{NiGd}} = +0.91 \text{ cm}^{-1}$  |                                                |
| 4 |  | Gd, Yb                                     | Ferromagnetic [Ni <sub>2</sub> Ln]                                               | <i>Inorg. Chem.</i> , 2008, <b>47</b> , 2280   |
| 5 |  | La, Ce, Pr, Nd, Sm, Eu, Gd, Tb, Dy, Ho, Er | Single molecule magnet [Ni <sub>2</sub> Dy]<br>$U_{\text{eff}} = 10.8 \text{ K}$ | <i>Inorg. Chem.</i> , 2008, <b>47</b> , 4918   |
| 6 |  | Eu                                         | –                                                                                | <i>Eur. J. Inorg. Chem.</i> , 2008, 5235       |

|    |                                                                                    |                           |                                                                                                                                                                                                                                               |                                                        |
|----|------------------------------------------------------------------------------------|---------------------------|-----------------------------------------------------------------------------------------------------------------------------------------------------------------------------------------------------------------------------------------------|--------------------------------------------------------|
| 7  | 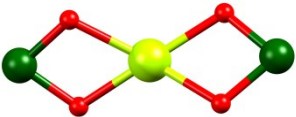  | La–Lu<br>except for<br>Pm | Weakly antiferromagnetic<br>[Ni <sub>2</sub> Ce], [Ni <sub>2</sub> Pr], and [Ni <sub>2</sub> Nd]<br><br>Ferromagnetic [Ni <sub>2</sub> Gd],<br>[Ni <sub>2</sub> Tb], [Ni <sub>2</sub> Dy], [Ni <sub>2</sub> Ho], and<br>[Ni <sub>2</sub> Er]. | <i>Inorg.<br/>Chem.</i> , 200<br>7, <b>46</b> , 3492   |
| 8  |   | Gd                        | Ferromagnetic [Ni <sub>2</sub> Gd]                                                                                                                                                                                                            | <i>Chem.<br/>Commun.</i> ,<br>2004, 1048               |
| 9  |   | Pr, Sm, Tb,<br>Er, Lu     | Ferromagnetic [Ni <sub>2</sub> Gd],<br>[Ni <sub>2</sub> Tb], [Ni <sub>2</sub> Er]                                                                                                                                                             | <i>Inorg.<br/>Chem.</i> ,<br>2003, <b>42</b> ,<br>1576 |
| 10 |  | La, Dy, Yb                | Antiferromagnetic [Ni <sub>2</sub> Ln]                                                                                                                                                                                                        | <i>Inorg.<br/>Chem.</i> ,<br>2000, <b>39</b> ,<br>508  |

### Ni<sub>2</sub>Ln<sub>2</sub>

|   |                                                                                     |                           |                                                                                                                                                                                                                                            |                                                          |
|---|-------------------------------------------------------------------------------------|---------------------------|--------------------------------------------------------------------------------------------------------------------------------------------------------------------------------------------------------------------------------------------|----------------------------------------------------------|
| 1 | 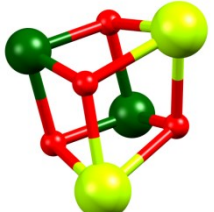 | Gd, Tb, Dy,<br>Ho         | –                                                                                                                                                                                                                                          | <i>New J.<br/>Chem.</i> ,<br>2020, <b>44</b> ,<br>4812   |
| 2 |  | Tb, Dy, Ho,<br>Er, Tm, Yb | Slow magnetic relaxation<br>[Ni <sub>2</sub> Tb <sub>2</sub> ] and [Ni <sub>2</sub> Dy <sub>2</sub> ]<br><br>U <sub>eff</sub> [Ni <sub>2</sub> Tb <sub>2</sub> ] = 13.6 K<br>U <sub>eff</sub> [Ni <sub>2</sub> Dy <sub>2</sub> ] = 11.52 K | <i>Dalton<br/>Trans.</i> ,<br>2017, <b>46</b> ,<br>12558 |
| 3 |  | Gd, Dy, Y                 | Slow magnetic relaxation<br>[Ni <sub>2</sub> Dy <sub>2</sub> ]<br><br>U <sub>eff</sub> = 16.0 K                                                                                                                                            | <i>Inorg.<br/>Chem.</i> , 201<br>7, <b>56</b> ,<br>11387 |

|    |                                                                                     |                                  |                                                                                                                                                                                                                                                  |                                                |
|----|-------------------------------------------------------------------------------------|----------------------------------|--------------------------------------------------------------------------------------------------------------------------------------------------------------------------------------------------------------------------------------------------|------------------------------------------------|
| 4  | 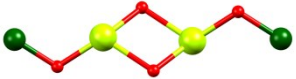   | Dy                               | Single molecule magnet<br>[Ni <sub>2</sub> Dy <sub>2</sub> ]                                                                                                                                                                                     | <i>Chem. Eur. J.</i> , 2016, <b>22</b> , 18840 |
| 5  |    | La, Gd, Tb,<br>Dy                | Ferromagnetic [Ni <sub>2</sub> Ln <sub>2</sub> ]                                                                                                                                                                                                 | <i>New J. Chem.</i> , 2016, <b>40</b> , 6998   |
| 6  |    | Tb, Dy, Ho,<br>Er, Tm, Yb,<br>Lu | Ferromagnetic [Ni <sub>2</sub> Tb <sub>2</sub> ] and<br>[Ni <sub>2</sub> Dy <sub>2</sub> ]                                                                                                                                                       | <i>Polyhedron</i> , 2015, <b>85</b> , 697      |
| 7  |    | Dy, Tb, Ho,<br>Lu                | Single molecule magnet<br>[Ni <sub>2</sub> Dy <sub>2</sub> ]<br>U <sub>eff</sub> = 19.0 K                                                                                                                                                        | <i>Chem. Eur. J.</i> , 2014, <b>20</b> , 14235 |
| 8  |   | Dy, Gd                           | Slow magnetic relaxation<br>[Ni <sub>2</sub> Dy <sub>2</sub> ]<br>U <sub>eff</sub> = 7.4 K                                                                                                                                                       | <i>Inorg. Chem.</i> , 2014, <b>22</b> , 12092  |
| 9  |  | La, Gd, Tb,<br>Dy, Ho            | Slow magnetic relaxation<br>[Ni <sub>2</sub> Dy <sub>2</sub> ]                                                                                                                                                                                   | <i>Inorg. Chem.</i> , 2014, <b>53</b> , 9785   |
| 10 |  | Gd, Tb, Dy                       | Single molecule magnet<br>[Ni <sub>2</sub> Tb <sub>2</sub> ] and [Ni <sub>2</sub> Dy <sub>2</sub> ]<br>U <sub>eff</sub> [Ni <sub>2</sub> Tb <sub>2</sub> ] = 12.2 K/6.1 K<br>U <sub>eff</sub> [Ni <sub>2</sub> Dy <sub>2</sub> ] = 18.1 K/14.5 K | <i>Inorg. Chem.</i> , 2013, <b>52</b> , 7218   |
| 11 |  | La, Gd, Tb,<br>Dy                | Antiferromagnetic [Ni <sub>2</sub> Dy <sub>2</sub> ]                                                                                                                                                                                             | <i>Inorg. Chem.</i> , 2012, <b>51</b> , 10211  |

|    |                                                                                                                                                                            |            |                                                                                                                                                                                               |                                               |
|----|----------------------------------------------------------------------------------------------------------------------------------------------------------------------------|------------|-----------------------------------------------------------------------------------------------------------------------------------------------------------------------------------------------|-----------------------------------------------|
| 12 | 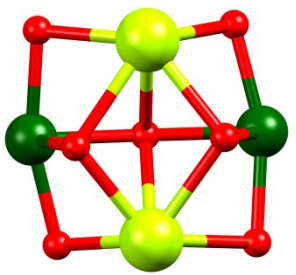                                                                                          | La, Tb, Dy | Antiferromagnetic [Ni <sub>2</sub> Ln <sub>2</sub> ]                                                                                                                                          | <i>Inorg. Chem.</i> , 2012, <b>51</b> , 10211 |
| 13 |                                                                                           | Gd, Dy     | Weak ferromagnetic Ni···Ln interaction and weak antiferromagnetic Ln···Ln interaction                                                                                                         | <i>Dalton Trans.</i> , 2012, <b>41</b> , 2320 |
| 14 |                                                                                           | Yb         | –                                                                                                                                                                                             | <i>Inorg. Chem.</i> , 2011, <b>50</b> , 5890  |
| 15 |                                                                                         | Dy, Tb, Gd | Slow magnetic relaxation [Ni <sub>2</sub> Dy <sub>2</sub> ]                                                                                                                                   | <i>Inorg. Chem.</i> , 2011, <b>50</b> , 1304  |
| 16 |                                                                                         | Tb, Dy     | Single molecule magnet [Ni <sub>2</sub> Dy <sub>2</sub> ]<br>U <sub>eff</sub> = 18–28 K                                                                                                       | <i>Inorg. Chem.</i> , 2011, <b>50</b> , 11604 |
| 17 | <br> | Dy         | Single molecule magnet [Ni <sub>2</sub> Dy <sub>2</sub> ]<br>U <sub>eff</sub> = 13.6 K<br>Single molecule magnet [Ni <sub>2</sub> Dy <sub>2</sub> ] <sub>n</sub><br>U <sub>eff</sub> = 17.4 K | <i>Dalton Trans.</i> , 2010, <b>39</b> , 4802 |

|    |                                                                                   |    |                                                      |                                                  |
|----|-----------------------------------------------------------------------------------|----|------------------------------------------------------|--------------------------------------------------|
| 18 | 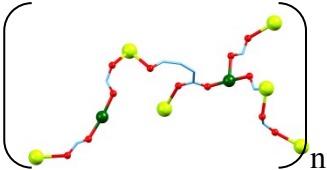 | Gd | Antiferromagnetic [Ni <sub>2</sub> Gd <sub>2</sub> ] | <i>Inorg. Chem.</i> , 2005, <b>44</b> , 5241     |
| 19 |  | Gd | Ferromagnetic [Ni <sub>2</sub> Gd <sub>2</sub> ]     | <i>Chem. Commun.</i> , 2004, 1048                |
| 20 |  | Er | Antiferromagnetic [Ni <sub>2</sub> Er <sub>2</sub> ] | <i>J. Chem. Soc., Dalton Trans.</i> , 1997, 1665 |

### Ni<sub>2</sub>Ln<sub>3</sub>

|   |                                                                                     |                       |                                                                                         |                                               |
|---|-------------------------------------------------------------------------------------|-----------------------|-----------------------------------------------------------------------------------------|-----------------------------------------------|
| 1 | 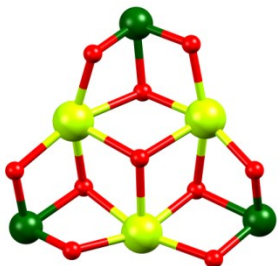  | Dy, Tb, Gd,<br>Ho, Er | Single molecule magnet<br>[Ni <sub>3</sub> Dy <sub>3</sub> ]<br>U <sub>eff</sub> = 10 K | <i>Inorg. Chem.</i> , 2014, <b>53</b> , 7815  |
| 2 |  | Gd, Dy, Tb,<br>Ho     | Single molecule magnet<br>[Ni <sub>2</sub> Dy <sub>3</sub> ]<br>U <sub>eff</sub> = 85 K | <i>Inorg. Chem.</i> , 2013, <b>52</b> , 13078 |

### Ni<sub>2</sub>Ln<sub>4</sub>

|   |                                                                                     |        |                                                                                                                    |                                          |
|---|-------------------------------------------------------------------------------------|--------|--------------------------------------------------------------------------------------------------------------------|------------------------------------------|
| 1 | 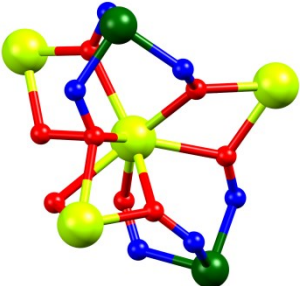 | Gd, Dy | Ferromagnetic [Ni <sub>2</sub> Gd <sub>4</sub> ]<br>Slow magnetic relaxation<br>[Ni <sub>2</sub> Dy <sub>4</sub> ] | <i>RSC Adv.</i> , 2014, <b>4</b> , 53870 |
|---|-------------------------------------------------------------------------------------|--------|--------------------------------------------------------------------------------------------------------------------|------------------------------------------|

---

### Ni<sub>3</sub>Ln

---

|   |                                                                                   |        |                                                |                                                    |
|---|-----------------------------------------------------------------------------------|--------|------------------------------------------------|----------------------------------------------------|
| 1 | 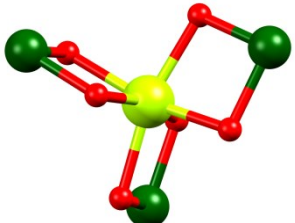 | Gd, Dy | Single molecule magnet<br>[Ni <sub>3</sub> Dy] | <i>Inorg. Chem.</i> ,<br>2010, <b>49</b> ,<br>9737 |
|---|-----------------------------------------------------------------------------------|--------|------------------------------------------------|----------------------------------------------------|

---

### Ni<sub>3</sub>Ln<sub>2</sub>

---

|   |                                                                                   |            |   |                                                    |
|---|-----------------------------------------------------------------------------------|------------|---|----------------------------------------------------|
| 1 | 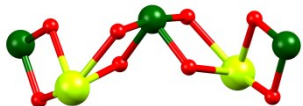 | La, Ce, Eu | – | <i>ChemistryS elect</i> , 2017,<br><b>2</b> , 7865 |
|---|-----------------------------------------------------------------------------------|------------|---|----------------------------------------------------|

---

### Ni<sub>4</sub>Ln

---

|   |                                                                                     |                   |                                                                                                       |                                             |
|---|-------------------------------------------------------------------------------------|-------------------|-------------------------------------------------------------------------------------------------------|---------------------------------------------|
| 1 |  | Gd, Tb, Dy,<br>Ho | Ferromagnetic [Ni <sub>4</sub> Ln]<br>$J_{\text{NiGd}} = + 0.34 \text{ cm}^{-1}$ [Ni <sub>4</sub> Gd] | <i>Eur. J. Inorg. Chem.</i> ,<br>2014, 3393 |
|---|-------------------------------------------------------------------------------------|-------------------|-------------------------------------------------------------------------------------------------------|---------------------------------------------|

---

### Ni<sub>4</sub>Ln<sub>2</sub>

---

|   |                                                                                     |                   |                                                                                                                                                                                                                                                                                                                                      |                                                       |
|---|-------------------------------------------------------------------------------------|-------------------|--------------------------------------------------------------------------------------------------------------------------------------------------------------------------------------------------------------------------------------------------------------------------------------------------------------------------------------|-------------------------------------------------------|
| 1 | 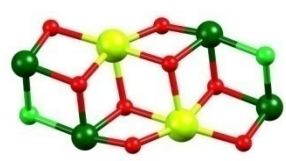 | Gd, Tb, Dy,<br>Ho | Single molecule magnet<br>[Ni <sub>4</sub> Tb <sub>2</sub> ], [Ni <sub>4</sub> Dy <sub>2</sub> ] and<br>[Ni <sub>4</sub> Ho <sub>2</sub> ]<br>$U_{\text{eff}}$ [Ni <sub>4</sub> Tb <sub>2</sub> ] = 13 K<br>$U_{\text{eff}}$ [Ni <sub>4</sub> Dy <sub>2</sub> ] = 20 K<br>$U_{\text{eff}}$ [Ni <sub>4</sub> Ho <sub>2</sub> ] = 19 K | <i>Cryst. Growth Des.</i> , 2020,<br><b>20</b> , 7300 |
|---|-------------------------------------------------------------------------------------|-------------------|--------------------------------------------------------------------------------------------------------------------------------------------------------------------------------------------------------------------------------------------------------------------------------------------------------------------------------------|-------------------------------------------------------|

---

|                                            |                                                                                     |                       |                                                                                                                                                                                                                                         |                                               |
|--------------------------------------------|-------------------------------------------------------------------------------------|-----------------------|-----------------------------------------------------------------------------------------------------------------------------------------------------------------------------------------------------------------------------------------|-----------------------------------------------|
| 2                                          | 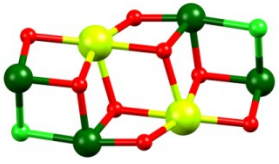   | Dy, Tb, Ho            | Single molecule magnet<br>[Ni <sub>4</sub> Tb <sub>2</sub> ] and [Ni <sub>4</sub> Dy <sub>2</sub> ]<br><br>U <sub>eff</sub> [Ni <sub>4</sub> Tb <sub>2</sub> ] = 26.3 K<br>U <sub>eff</sub> [Ni <sub>4</sub> Dy <sub>2</sub> ] = 23.0 K | <i>Inorg. Chem.</i> , 2019, <b>58</b> , 12184 |
|                                            |    |                       | Single molecule magnet<br>[Ni <sub>4</sub> Tb <sub>2</sub> ] and [Ni <sub>4</sub> Dy <sub>2</sub> ]<br><br>U <sub>eff</sub> [Ni <sub>4</sub> Tb <sub>2</sub> ] = 30.6 K<br>U <sub>eff</sub> [Ni <sub>4</sub> Dy <sub>2</sub> ] = 26.0 K |                                               |
| 3                                          |    | Gd, Tb, Dy, Ho        | Single molecule magnet<br>[Ni <sub>4</sub> Tb <sub>2</sub> ], [Ni <sub>4</sub> Dy <sub>2</sub> ]<br><br>Slow magnetic relaxation<br>[Ni <sub>4</sub> Ho <sub>2</sub> ]                                                                  | <i>Inorg. Chem.</i> , 2014, <b>53</b> , 3519  |
| 4                                          |   | Gd, Dy                | Antiferromagnetic [Ni <sub>4</sub> Gd <sub>2</sub> ]<br>Slow magnetic relaxation<br>[Ni <sub>4</sub> Dy <sub>2</sub> ]                                                                                                                  | <i>Inorg. Chem.</i> , 2012, <b>51</b> , 2699  |
| <b><u>Ni<sub>4</sub>Ln<sub>4</sub></u></b> |                                                                                     |                       |                                                                                                                                                                                                                                         |                                               |
| 1                                          |  | Y, Gd, Tb, Dy, Ho, Er | Ferromagnetic [Ni <sub>4</sub> Ln <sub>4</sub> ]<br>J <sub>NiGd</sub> = + 0.86 cm <sup>-1</sup> [Ni <sub>4</sub> Gd <sub>4</sub> ]                                                                                                      | <i>ACS Omega</i> , 2018, <b>3</b> , 5202      |
| 2                                          |  | Dy, Tb, Gd, Ho        | Single molecule magnet<br>[Ni <sub>4</sub> Dy <sub>4</sub> ]<br><br>Slow magnetic relaxation<br>[Ni <sub>4</sub> Tb <sub>4</sub> ]                                                                                                      | <i>Inorg. Chem.</i> , 2016, <b>55</b> , 8422  |

|                                            |                                                                                     |            |                                                                                                                                                                                                  |                                                |
|--------------------------------------------|-------------------------------------------------------------------------------------|------------|--------------------------------------------------------------------------------------------------------------------------------------------------------------------------------------------------|------------------------------------------------|
| 3                                          | 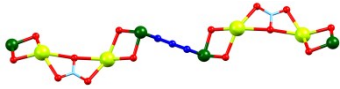   | Sm, Gd     | Ferromagnetic [Ni <sub>4</sub> Gd <sub>4</sub> ]                                                                                                                                                 | <i>Dalton Trans.</i> , 2014, <b>43</b> , 9136  |
| <b><u>Ni<sub>5</sub>Ln<sub>3</sub></u></b> |                                                                                     |            |                                                                                                                                                                                                  |                                                |
| 1                                          |    | Gd, Dy     | Ferromagnetic [Ni <sub>5</sub> Gd <sub>3</sub> ]<br>Slow magnetic relaxation [Ni <sub>5</sub> Dy <sub>3</sub> ]                                                                                  | <i>Dalton Trans.</i> , 2013, <b>42</b> , 5298  |
| <b><u>Ni<sub>5</sub>Ln<sub>4</sub></u></b> |                                                                                     |            |                                                                                                                                                                                                  |                                                |
| 1                                          |   | Eu, Gd, Dy | Single molecule magnet [Ni <sub>5</sub> Dy <sub>4</sub> ]<br>Ferromagnetic [Ni <sub>5</sub> Gd <sub>4</sub> ]<br>Ferromagnetic [Ni <sub>5</sub> Eu <sub>4</sub> ]                                | <i>Dalton Trans.</i> , 2018, <b>47</b> , 16850 |
| <b><u>Ni<sub>6</sub>Ln<sub>3</sub></u></b> |                                                                                     |            |                                                                                                                                                                                                  |                                                |
| 1                                          |  | Gd, Dy, Er | Single molecule magnet [Ni <sub>6</sub> Dy <sub>3</sub> ]<br>U <sub>eff</sub> = 24 K<br>Antiferromagnetic [Ni <sub>6</sub> Er <sub>3</sub> ]<br>Ferromagnetic [Ni <sub>6</sub> Gd <sub>3</sub> ] | <i>Inorg. Chem.</i> , 2015, <b>54</b> , 7089   |



## Ni<sub>6</sub>Ln<sub>6</sub>

1

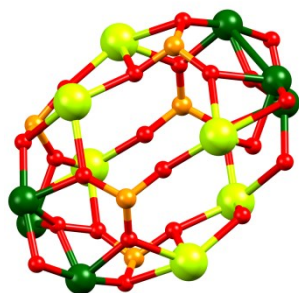

Gd, Dy

Ferromagnetic [Ni<sub>6</sub>Gd<sub>6</sub>]

*Angew. Chem.*,  
2011, **123**,  
3776

## Ni<sub>8</sub>Ln<sub>8</sub>

1

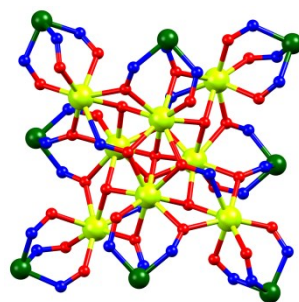

Dy

Slow magnetic relaxation  
[Ni<sub>8</sub>Dy<sub>8</sub>]

*Inorg. Chem.*,  
2010, **49**,  
9743

## Large nuclearity

1

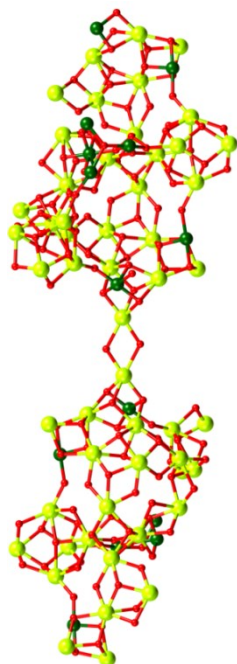

Gd, Dy

Slow magnetic relaxation  
[Ni<sub>10</sub>Dy<sub>42</sub>]

*J. Am. Chem. Soc.*,  
2012, **134**,  
3314

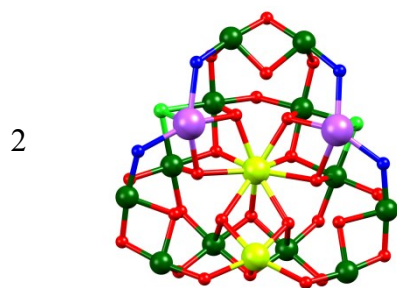

Dy, Tb

Slow magnetic relaxation  
[Na<sub>2</sub>Ni<sub>12</sub>Ln<sub>2</sub>]

*Chem. Commun.*,  
2012, **48**,  
7456

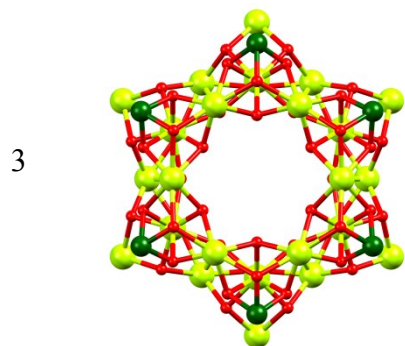

Gd

Antiferromagnetic [Ni<sub>12</sub>Gd<sub>36</sub>]

*Angew. Chem.*,  
2011, **123**,  
10837

---

**Color code:** Ni<sup>II</sup>: Deep green, Ln<sup>III</sup>: Light green, Na: Violet, Phosphorous: Orange, Oxygen: Red, Nitrogen: Blue, Chloride: Green

---

**Table S2** Crystal refinement parameters of **A3** and complexes **1–4**.

| <b>Complex</b>                              | <b>A3</b>                                                                            | <b>1</b>                                                                            | <b>2</b>                                                                             | <b>3</b>                                                                            | <b>4</b>                                                                            |
|---------------------------------------------|--------------------------------------------------------------------------------------|-------------------------------------------------------------------------------------|--------------------------------------------------------------------------------------|-------------------------------------------------------------------------------------|-------------------------------------------------------------------------------------|
| Chemical formula                            | C <sub>28</sub> H <sub>42</sub> Cl <sub>2</sub> N <sub>4</sub> Ni<br>O <sub>14</sub> | C <sub>30</sub> H <sub>39</sub> Gd <sub>2</sub> N <sub>9</sub><br>NiO <sub>18</sub> | C <sub>30</sub> H <sub>39</sub> N <sub>9</sub> Ni<br>O <sub>18</sub> Tb <sub>2</sub> | C <sub>30</sub> H <sub>39</sub> Dy <sub>2</sub> N <sub>9</sub><br>NiO <sub>18</sub> | C <sub>30</sub> H <sub>39</sub> Ho <sub>2</sub> N <sub>9</sub><br>NiO <sub>18</sub> |
| Formula weight                              | 788.25                                                                               | 1186.89                                                                             | 1190.27                                                                              | 1197.41                                                                             | 1202.27                                                                             |
| Crystal color, habit                        | Orange block                                                                         | Orange block                                                                        | Orange block                                                                         | Orange block                                                                        | Orange block                                                                        |
| Temperature (K)                             | 296(2)                                                                               | 298(2)                                                                              | 297(2)                                                                               | 293(2)                                                                              | 296(2)                                                                              |
| Crystal system                              | Triclinic                                                                            | Monoclinic                                                                          | Monoclinic                                                                           | Monoclinic                                                                          | Monoclinic                                                                          |
| Space group                                 | <i>P</i> $\bar{1}$                                                                   | <i>P</i> 2 <sub>1</sub> / <i>c</i>                                                  | <i>P</i> 2 <sub>1</sub> / <i>c</i>                                                   | <i>P</i> 2 <sub>1</sub> / <i>c</i>                                                  | <i>P</i> 2 <sub>1</sub> / <i>c</i>                                                  |
| Unit cell dimensions                        |                                                                                      |                                                                                     |                                                                                      |                                                                                     |                                                                                     |
| <i>a</i> (Å)                                | 11.4638(7)                                                                           | 12.8995(7)                                                                          | 12.8433(12)                                                                          | 12.8472(8)                                                                          | 12.8244(6)                                                                          |
| <i>b</i> (Å)                                | 12.0205(8)                                                                           | 18.7091(10)                                                                         | 18.6429(17)                                                                          | 18.6399(12)                                                                         | 18.6644(8)                                                                          |
| <i>c</i> (Å)                                | 14.4633(9)                                                                           | 18.0277(10)                                                                         | 17.9984(16)                                                                          | 17.9789(11)                                                                         | 17.9432(8)                                                                          |
| $\beta$ (deg)                               | 68.567(2)                                                                            | 109.147(2)                                                                          | 108.867(4)                                                                           | 108.883(2)                                                                          | 108.793(2)                                                                          |
| Volume (Å <sup>3</sup> ),<br><i>Z</i>       | 1798.5(2)                                                                            | 4110.1(4)                                                                           | 4077.9(7)                                                                            | 4073.7(4)                                                                           | 4065.9(3)                                                                           |
| Density (mg<br>m <sup>-3</sup> )            | 1.456                                                                                | 1.918                                                                               | 1.942                                                                                | 1.956                                                                               | 1.967                                                                               |
| Absolute coefficient<br>(mm <sup>-1</sup> ) | 0.757                                                                                | 3.727                                                                               | 3.973                                                                                | 4.173                                                                               | 4.398                                                                               |
| F(000)                                      | 824.0                                                                                | 2328.0                                                                              | 2344.0                                                                               | 2352.0                                                                              | 2360.0                                                                              |
| Crystal size<br>(mm)                        | 0.28×0.22×<br>0.17                                                                   | 0.32×0.25×<br>0.25                                                                  | 0.30×0.23×<br>0.22                                                                   | 0.28×0.22×<br>0.16                                                                  | 0.27×0.26×<br>0.18                                                                  |

| Complex                                         | A3                                                                   | 1                                                                    | 2                                                                    | 3                                                                    | 4                                                                    |
|-------------------------------------------------|----------------------------------------------------------------------|----------------------------------------------------------------------|----------------------------------------------------------------------|----------------------------------------------------------------------|----------------------------------------------------------------------|
| $\theta$ range (deg)                            | 1.514–24.997                                                         | 2.484–<br>26.353                                                     | 2.778–<br>26.094                                                     | 2.492–<br>25.698                                                     | 2.490–<br>25.714                                                     |
| Limiting indices                                | $-13 \leq h \leq 13$<br>$-14 \leq k \leq 13$<br>$-17 \leq l \leq 17$ | $-16 \leq h \leq 16$<br>$-23 \leq k \leq 23$<br>$-22 \leq l \leq 22$ | $-15 \leq h \leq 15$<br>$-22 \leq k \leq 23$<br>$-22 \leq l \leq 22$ | $-15 \leq h \leq 15$<br>$-22 \leq k \leq 22$<br>$-21 \leq l \leq 21$ | $-15 \leq h \leq 15$<br>$-22 \leq k \leq 22$<br>$-21 \leq l \leq 21$ |
| Reflections collected                           | 20941                                                                | 59314                                                                | 53741                                                                | 55888                                                                | 40778                                                                |
| Unique reflections ( $R_{int}$ )                | 6335<br>(0.0244)                                                     | 8394<br>(0.0226)                                                     | 8086<br>(0.0365)                                                     | 7755<br>(0.0217)                                                     | 7759<br>(0.0484)                                                     |
| Reflections with $I > 2\sigma(I)$               | 5231<br>99.6 %                                                       | 7190<br>99.5 %                                                       | 6525<br>99.0 %                                                       | 6686<br>99.5 %                                                       | 5930<br>99.3 %                                                       |
| Completeness to $\theta$                        | (24.99)                                                              | %(25.24)                                                             | (25.24)                                                              | (25.24)                                                              | (25.24)                                                              |
| Data/Resistant /Parameters                      | 6310/76/451                                                          | 8352/51/571                                                          | 8003/34/569                                                          | 7720/21/564                                                          | 7704/52/571                                                          |
| GOOF on $F^2$                                   | 1.106                                                                | 1.180                                                                | 1.059                                                                | 1.225                                                                | 1.022                                                                |
| Final R indices [ $I > 2\sigma(I)$ ]            | 0.0787 <sup>b</sup> ,<br>(0.2523 <sup>c</sup> )                      | 0.0372 <sup>b</sup> ,<br>(0.0757 <sup>c</sup> )                      | 0.0686 <sup>b</sup> ,<br>(0.1618 <sup>c</sup> )                      | 0.0376 <sup>b</sup> ,<br>(0.0818 <sup>c</sup> )                      | 0.0411 <sup>b</sup> ,<br>(0.0922 <sup>c</sup> )                      |
| R indices (all data)                            | 0.0902 <sup>b</sup> ,<br>(0.2682 <sup>c</sup> )                      | 0.0475 <sup>b</sup> ,<br>(0.0834 <sup>c</sup> )                      | 0.0856 <sup>b</sup> ,<br>(0.1781 <sup>c</sup> )                      | 0.0484 <sup>b</sup> ,<br>(0.0933 <sup>c</sup> )                      | 0.0630 <sup>b</sup> ,<br>(0.1043 <sup>c</sup> )                      |
| Max/Min residual peaks ( $e \text{ \AA}^{-3}$ ) | 1.129/–0.593                                                         | 1.510/–0.939                                                         | 4.194/–1.799                                                         | 1.598/–0.859                                                         | 1.315/–1.053                                                         |

<sup>a</sup>Graphite monochromator, <sup>b</sup> $R_1 = \Sigma(|F_o| - |F_c|)/\Sigma|F_o|$ , <sup>c</sup> $wR_2 = \{\Sigma[w(|F_o|^2 - |F_c|^2)^2]/\Sigma[w(|F_o|^2)^2]\}^{1/2}$

**Table S3** Continuous Shape Measures (CShMs) of lanthanide (Gd, Tb, Dy and Ho) centers in complexes **1–4** relative to ideal 8/9–vertex polyhedra. The lowest CShMs value which corresponds to closest geometry is highlighted in bold.

| <b>8–vertex polyhedra</b> |              |              |              |              |                            |                                               |
|---------------------------|--------------|--------------|--------------|--------------|----------------------------|-----------------------------------------------|
|                           | <b>Gd1</b>   | <b>Tb1</b>   | <b>Dy1</b>   | <b>Ho1</b>   | <b>Symmetry</b>            | <b>Ideal shape</b>                            |
| OP–8                      | 32.417       | 32.239       | 32.187       | 32.227       | $D_{8h}$                   | Octagon                                       |
| HPY–8                     | 22.510       | 22.867       | 22.934       | 23.121       | $C_{7v}$                   | Heptagonal pyramid                            |
| HBPY–8                    | 16.233       | 16.407       | 16.424       | 16.529       | $D_{6h}$                   | Hexagonal bipyramid                           |
| CU–8                      | 12.284       | 12.135       | 12.063       | 11.900       | $Oh$                       | Cube                                          |
| SAPR–8                    | 3.535        | 3.368        | 3.337        | 3.295        | $D_{4d}$                   | Square antiprism                              |
| <b>TDD–8</b>              | <b>1.415</b> | <b>1.356</b> | <b>1.290</b> | <b>1.240</b> | <b><math>D_{2d}</math></b> | <b>Triangular<br/>dodecahedron</b>            |
| JGBF–8                    | 12.399       | 12.496       | 12.412       | 12.406       | $D_{2d}$                   | Johnson gyrobifastigium<br>J26                |
| JETBPY–<br>8              | 26.879       | 27.192       | 27.211       | 27.532       | $D_{3h}$                   | Johnson elongated<br>triangular bipyramid J14 |
| JBTPR–8                   | 2.488        | 2.474        | 2.401        | 2.410        | $C_{2v}$                   | Biaugmented trigonal<br>prism J50             |
| BTPR–8                    | 2.214        | 2.196        | 2.175        | 2.177        | $C_{2v}$                   | Biaugmented trigonal<br>prism                 |
| JSD–8                     | 3.116        | 3.071        | 2.959        | 2.920        | $D_{2d}$                   | Snub diphenoid J84                            |
| TT–8                      | 12.658       | 12.494       | 12.412       | 12.242       | $Td$                       | Triakis tetrahedron                           |
| ETBPY–8                   | 23.810       | 24.093       | 24.219       | 24.295       | $D_{3h}$                   | Elongated trigonal<br>bipyramid               |
| <b>9–vertex polyhedra</b> |              |              |              |              |                            |                                               |
|                           | <b>Gd2</b>   | <b>Tb2</b>   | <b>Dy2</b>   | <b>Ho2</b>   | <b>Symmetry</b>            | <b>Ideal shape</b>                            |
| EP–9                      | 33.396       | 33.646       | 33.630       | 33.888       | $D_{9h}$                   | Enneagon                                      |
| OPY–9                     | 24.246       | 24.274       | 24.416       | 24.525       | $C_{8v}$                   | Octagonal pyramid                             |
| HBPY–9                    | 17.131       | 17.329       | 17.273       | 17.344       | $D_{7h}$                   | Heptagonal bipyramid                          |

|              |              |              |              |              |          |                                       |
|--------------|--------------|--------------|--------------|--------------|----------|---------------------------------------|
| JTC-9        | 12.029       | 12.148       | 12.223       | 12.268       | $C_{3v}$ | Johnson triangular cupola<br>J3       |
| JCCU-9       | 8.330        | 8.416        | 8.324        | 8.376        | $C_{4v}$ | Capped cube J8                        |
| CCU-9        | 6.938        | 7.039        | 6.938        | 6.995        | $C_{4v}$ | Spherical-relaxed capped<br>cube      |
| JCSAPR-<br>9 | 4.408        | 4.403        | 4.278        | 4.233        | $C_{4v}$ | Capped square antiprism<br>J10        |
| CSAPR-9      | 3.364        | 3.360        | 3.249        | 3.220        | $C_{4v}$ | Spherical capped square<br>antiprism  |
| JTCTPR-<br>9 | 3.888        | 3.860        | 3.768        | 3.747        | $D_{3h}$ | Tricapped trigonal prism<br>J51       |
| TCTPR-9      | 3.116        | 3.049        | 2.957        | 2.894        | $D_{3h}$ | Spherical tricapped<br>trigonal prism |
| JTDIC-9      | 11.717       | 11.785       | 11.806       | 11.766       | $C_{3v}$ | Tridiminished<br>icosahedron J63      |
| HH-9         | 9.176        | 9.334        | 9.262        | 9.313        | $C_{2v}$ | Hula-hoop                             |
| <b>MFF-9</b> | <b>2.642</b> | <b>2.658</b> | <b>2.537</b> | <b>2.528</b> | $C_s$    | <b>Muffin</b>                         |

---

**Table S4** Some important metric parameter of Ln<sub>2</sub>O<sub>2</sub> core.

| Complex                                |                                                    | 1          | 2         | 3          | 4        |
|----------------------------------------|----------------------------------------------------|------------|-----------|------------|----------|
| Dihedral Angle                         | Angle between the Plane of O5–Ln1–O2 and O5–Ln2–O2 | 1.31(18)   | 1.2(4)    | 1.06(19)   | 1.0(3)   |
| Torsional angle                        | O5–Ln2–O2–Ln1                                      | 1.13(13)   | 1.0(3)    | 0.91(13)   | 0.85(19) |
| Bridge angle                           | Ln1–O2–Ln2                                         | 108.57(16) | 108.8(3)  | 108.62(16) | 108.9(2) |
|                                        | Ln1–O5–Ln2                                         | 108.52(16) | 108.9(3)  | 108.68(17) | 109.1(2) |
| Distance                               | Ln1–O1                                             | 2.418(3)   | 2.399(8)  | 2.387(4)   | 2.386(6) |
|                                        | Ln1–O2                                             | 2.284(3)   | 2.271(7)  | 2.260(3)   | 2.251(4) |
|                                        | Ln1–O4                                             | 2.474(3)   | 2.467(6)  | 2.458(3)   | 2.458(4) |
|                                        | Ln1–O5                                             | 2.293(4)   | 2.269(8)  | 2.263(4)   | 2.244(5) |
|                                        | Ln2–O2                                             | 2.286(3)   | 2.262(8)  | 2.259(4)   | 2.243(5) |
|                                        | Ln2–O5                                             | 2.280(3)   | 2.260(6)  | 2.255(3)   | 2.243(4) |
|                                        | Ln···Ln(intramolecular)                            | 3.7108(6)  | 3.686(8)  | 3.670(6)   | 3.655(5) |
| Ln···Ln(closest distance from packing) | 7.4798(6)                                          | 7.4876(9)  | 7.4988(6) | 7.5211(5)  |          |

**Table S5** Hydrogen bonding parameter found in **1–4**, (distances, Å, angles, (°)).

| <b>Complex 1</b>          |            |              |              |                |
|---------------------------|------------|--------------|--------------|----------------|
| <b>Donor–H···Acceptor</b> | <b>D–H</b> | <b>H···A</b> | <b>D···A</b> | <b>D–H···A</b> |
| O3···H3···O7A             | 0.85(6)    | 2.23(5)      | 3.048(6)     | 161(6)         |
| O3···H3···O7B             | 0.85(6)    | 2.28(6)      | 2.959(7)     | 137(5)         |
| O6···H6···O8A             | 0.86(4)    | 2.05(3)      | 2.874(9)     | 163(4)         |

  

| <b>Complex 2</b>          |            |              |              |                |
|---------------------------|------------|--------------|--------------|----------------|
| <b>Donor–H···Acceptor</b> | <b>D–H</b> | <b>H···A</b> | <b>D···A</b> | <b>D–H···A</b> |
| O3···H3···O7A             | 0.86(8)    | 2.27(8)      | 3.058(14)    | 153(8)         |
| O3···H3···O7B             | 0.86(8)    | 2.18(8)      | 2.921(15)    | 144(8)         |
| O6···H6···O8A             | 0.86(5)    | 2.10(5)      | 2.912(16)    | 158(5)         |

  

| <b>Complex 3</b>          |            |              |              |                |
|---------------------------|------------|--------------|--------------|----------------|
| <b>Donor–H···Acceptor</b> | <b>D–H</b> | <b>H···A</b> | <b>D···A</b> | <b>D–H···A</b> |
| O3···H3···O7A             | 0.85(7)    | 2.27(6)      | 3.088(7)     | 164(7)         |
| O3···H3···O7B             | 0.85(7)    | 2.28(8)      | 2.926(8)     | 134(7)         |
| O6···H6···O8A             | 0.86(4)    | 2.07(4)      | 2.895(9)     | 160(4)         |

  

| <b>Complex 4</b>          |            |              |              |                |
|---------------------------|------------|--------------|--------------|----------------|
| <b>Donor–H···Acceptor</b> | <b>D–H</b> | <b>H···A</b> | <b>D···A</b> | <b>D–H···A</b> |
| O3···H3···O7A             | 0.86(5)    | 2.36(5)      | 3.124(8)     | 147(5)         |
| O3···H3···O7B             | 0.86(5)    | 2.16(5)      | 2.930(9)     | 148(6)         |
| O6···H6···O8A             | 0.87(4)    | 2.04(3)      | 2.887(11)    | 165(5)         |



**Table S6** C–H $\cdots\pi$  interaction parameter found in **1–4**, (distances, Å).

| C–H $\cdots\pi$     | H $\cdots\pi$ Distances (Å) |           |           |           |
|---------------------|-----------------------------|-----------|-----------|-----------|
|                     | Complex 1                   | Complex 2 | Complex 3 | Complex 4 |
| C10–H10B $\cdots$ X | 2.71                        | 2.72      | 2.71      | 2.71      |
| C23–H23A $\cdots$ Y | 2.87                        | 2.86      | 2.86      | 2.87      |
| C28–H28A $\cdots$ Y | 2.82                        | 2.76      | 2.80      | 2.80      |

X = C1 – C6 inclusive, Y = Ni4 – N4 inclusive
